# Supplementary material for: Australian voters’ attitudes to climate action and their social-political determinants
Source: PLoS One. 2021 Mar 24;16(3):e0248268. doi: 10.1371/journal.pone.0248268 (PMC7990191; doi:10.1371/journal.pone.0248268)
Supplement: S1 Data — (XLSX) [file pone.0248268.s002.xlsx]

## Sheet: S1 Data
ANU_Q1	ANU_Q2	ANU_Q3	ANU_Q4	CSES_Q15	CSES_Q15_Oth	CSES_Q16	CSES_Q16_Oth	p_state	p_region	p_geography	p_seifa	p_gender	p_age_group	p_cob_group	p_citizen	p_lote	p_income	p_atsi	p_household_str	p_education
2	3	1	2	2		2		1	2	2	5	2	5	1	1	2	6	4	2	1
1	3	2	1	1		1		1	1	1	3	2	6	1	1	2	5	4	2	3
1	3	4	2	2		2		1	2	2	4	2	6	1	1	2	10	4	3	4
1	3	2	2	2		2		1	2	2	3	1	6	1	1	2	10	4	2	4
1	4	1	2	3		1		1	2	2	3	2	5	1	1	2	2	4	3	4
2	2	4	5	1		1		1	2	2	2	2	5	1	1	2	10	4	2	7
2	3	2	2	2		2		1	2	2	1	1	5	1	1	2	7	4	2	5
2	3	2	5	-98		2		1	2	2	1	2	7	1	1	2	10	1	1	9
1	4	2	1	1		1		1	2	2	1	2	5	1	1	2	10	4	1	7
2	2	4	5	1		1		1	2	2	1	2	4	1	1	2	10	4	4	5
4	4	1	1	4		4		1	2	2	1	2	4	1	1	2	9	4	1	6
2	2	3	2	1		8		1	1	1	4	1	3	2	1	1	3	4	3	1
2	3	4	4	1		1		1	1	1	5	2	7	1	1	2	9	4	1	6
3	2	4	2	1		6		1	1	1	5	1	4	1	1	2	3	4	2	5
1	1	3	5	1		1		1	1	1	3	2	5	1	1	2	10	4	3	-97
2	2	3	2	1		1		1	1	1	5	2	6	2	1	1	8	4	1	7
2	5	2	5	1		1		1	1	1	3	2	6	1	1	2	13	4	3	9
4	4	1	1	2		2		1	1	1	5	2	7	1	1	2	2	4	1	1
3	5	2	5	1		1		1	1	1	3	2	7	3	1	2	10	4	1	7
3	5	4	5	1		1		1	1	1	4	2	7	1	1	2	10	4	2	7
1	4	2	2	97		4		1	1	1	4	2	4	1	1	2	-99	4	4	1
2	4	2	2	2		2		2	2	4	2	1	7	1	1	2	-99	4	2	2
1	2	1	2	1		-98		2	2	4	2	1	7	1	1	2	12	4	3	8
4	1	4	2	3		5	Christian Party	2	2	4	4	1	7	1	1	2	11	4	2	4
2	2	3	4	1		1		2	1	3	4	2	4	1	1	1	13	4	4	5
1	3	2	2	2		2		2	1	3	3	2	6	1	1	1	10	4	2	1
2	3	2	3	2		2		6	1	11	1	2	4	1	1	2	4	4	7	2
2	4	-98	5	2		2		6	1	11	1	2	6	1	1	2	15	4	2	7
2	3	2	5	1		1		2	1	3	1	2	6	1	1	2	11	4	1	3
1	4	2	2	1		1		2	1	3	5	2	7	1	1	2	9	4	6	9
1	4	2	5	1		1		2	1	3	5	1	6	1	1	2	6	4	2	1
3	1	4	5	51		51		2	1	3	5	2	5	1	1	2	11	4	1	3
1	4	1	1	2		4		2	1	3	3	1	5	1	1	2	7	4	3	2
1	3	2	1	2		2		2	2	4	1	1	6	2	1	2	7	4	2	5
1	3	2	2	2		4		2	1	3	3	2	6	1	1	2	12	4	1	2
1	4	2	1	97		1		2	1	3	4	2	6	1	1	2	9	4	2	6
1	4	2	3	2		2		2	1	3	5	1	5	2	1	1	6	4	3	5
1	3	3	2	4		4		2	1	3	5	2	6	2	1	2	-98	4	6	3
4	4	2	2	2		2		2	1	3	5	2	6	1	1	2	-99	4	1	7
2	5	2	4	51		51		3	1	5	2	2	7	1	1	2	10	4	2	3
2	2	2	5	3		2		3	1	5	1	2	6	1	1	2	10	4	2	5
1	5	2	2	2		11		3	1	5	3	1	6	1	1	2	11	4	2	1
2	2	2	4	1		1		3	1	5	1	1	6	1	1	2	6	4	1	5
4	2	4	4	2		2		3	1	5	5	1	5	1	1	2	4	4	3	6
1	4	1	1	2		2		3	1	5	5	2	4	1	1	2	10	4	10	7
2	2	2	4	-97		-97		3	2	6	2	2	6	1	1	2	4	4	2	3
2	2	2	4	1		1		3	1	5	5	2	5	1	1	2	-99	4	2	3
4	2	4	4	1		1		3	1	5	3	1	5	1	1	2	3	4	3	5
1	4	1	1	4		4		3	1	5	4	2	5	3	1	2	12	4	2	3
3	5	4	5	51		51		3	1	5	4	1	6	1	1	2	3	4	2	6
4	3	2	2	2		2		3	2	6	2	2	6	3	1	2	12	4	2	3
4	4	2	2	1		1		3	2	6	1	2	4	1	1	2	6	4	6	4
2	2	4	5	2		2		3	2	6	1	2	5	1	1	2	5	4	1	5
4	1	4	4	51		51		3	2	6	2	1	6	1	1	2	10	4	1	-97
2	2	4	3	-99		-99		3	2	6	3	1	6	1	1	2	-99	4	1	-97
2	4	2	2	2		2		3	2	6	3	1	4	1	1	2	9	4	1	4
3	3	4	5	1		1		3	2	6	2	2	6	1	1	2	-98	4	4	6
1	3	2	2	1		1		3	1	5	1	2	7	1	1	2	10	4	1	6
2	3	2	2	2		4		3	2	6	4	1	7	1	1	1	7	4	2	1
2	2	2	3	1		1		4	1	7	3	2	7	1	1	2	11	4	2	9
2	2	4	2	1		1		4	1	7	2	2	6	1	1	2	10	4	1	2
1	3	2	1	4		4		4	1	7	4	2	3	1	1	1	5	4	7	2
1	3	2	2	1		1		4	1	7	4	2	4	1	1	2	9	4	4	3
1	4	2	2	1		1		4	1	7	4	2	3	1	1	2	10	4	4	5
2	2	3	2	1		1		4	1	7	1	1	5	1	1	2	4	4	1	5
1	3	3	2	1		1		5	1	9	4	2	4	2	1	2	-99	4	4	4
1	3	2	2	2		2		5	1	9	4	2	7	2	1	1	10	4	1	3
1	4	1	2	1		1		5	1	9	2	2	7	1	1	2	4	4	2	6
1	2	3	2	1		1		5	1	9	3	2	6	3	2	2	14	4	2	6
2	3	1	2	1		4		5	1	9	5	2	6	2	1	2	-97	4	2	2
4	2	4	2	1		1		5	2	10	2	1	5	1	1	2	-99	4	2	3
1	4	1	1	-98		2		5	2	10	2	2	7	1	1	2	10	4	1	3
4	4	4	4	1		11		5	1	9	4	1	3	2	1	1	3	4	3	4
4	3	2	2	2		2		3	1	5	5	1	5	1	1	2	3	4	4	1
2	4	2	6	-96		-96		3	2	6	3	2	2	2	2	1	4	4	2	1
1	3	1	1	4		4		1	2	2	2	1	5	1	1	2	6	4	2	3
1	4	2	2	1		11		1	2	2	4	2	2	1	1	2	4	4	1	1
2	2	3	5	1		1		1	2	2	2	2	6	1	1	2	10	4	2	7
1	4	3	2	4		4		4	1	7	3	1	2	1	1	2	12	4	6	5
1	3	2	2	2		4		2	1	3	5	1	4	2	1	1	5	4	3	3
2	3	3	5	2		2		2	1	3	5	2	2	1	1	1	8	4	3	6
4	2	4	6					5	1	9	2	2	3	3	2	2	9	4	7	6
2	3	2	5	51		51		3	1	5	5	1	5	1	1	2	5	4	2	5
1	3	2	5	1		1		5	1	9	4	2	3	1	1	2	6	4	4	6
1	4	4	1	97		2		2	2	4	5	2	6	1	1	2	10	4	2	-97
2	2	2	3	1		1		5	1	9	5	2	3	3	1	2	8	4	4	1
3	2	2	5	11		11		1	2	2	3	1	6	1	1	2	10	4	2	8
1	2	2	2	2		1		3	1	5	4	2	-97	3	1	2	6	4	7	5
2	1	4	4	1		13		2	1	3	2	3	6	1	1	2	-99	4	1	4
1	4	3	2	4		4		2	1	3	4	1	2	1	1	2	5	4	2	2
2	2	2	2	2		2		3	1	5	3	2	5	1	1	2	10	4	3	5
2	3	2	3	1		1		1	2	2	2	2	5	1	1	2	10	4	2	5
2	2	2	2	-97		-97		5	1	9	4	1	5	2	1	1	2	4	3	1
2	5	3	5	1		1		4	1	7	5	1	6	1	1	2	9	4	2	9
1	4	2	6	-97		-97		1	1	1	5	2	7	3	2	2	9	4	1	4
4	4	1	2	2		4		2	1	3	3	2	6	1	1	2	10	4	10	5
1	3	2	2	1		1		2	1	3	5	2	2	1	1	2	6	4	4	4
2	2	4	5	-99		-99		1	1	1	4	2	4	1	1	2	11	4	5	5
1	4	2	2	2		2		2	1	3	5	2	5	1	1	2	5	4	3	3
1	3	2	1	2		4		2	1	3	5	2	6	1	1	2	2	4	2	3
2	3	2	3	1		1		4	1	7	3	2	3	1	1	2	4	4	4	2
1	4	1	2	2		2		8	1	15	5	2	4	1	1	2	2	4	4	2
1	4	2	2	4		2		1	2	2	3	1	7	3	2	2	11	4	2	3
1	4	2	2	2		2		1	2	2	5	2	6	1	1	2	2	4	2	1
1	5	2	5	1		1		3	2	6	3	2	6	1	1	2	13	4	2	9
3	4	4	5	1		1		1	1	1	2	1	5	1	1	2	7	4	2	9
2	4	4	5	11		-98		5	1	9	2	1	2	1	1	2	7	4	1	5
2	2	2	4	2		2		2	1	3	1	2	3	1	1	2	9	4	7	4
1	4	1	2	4		4		1	1	1	5	1	3	1	1	2	7	4	4	3
4	1	4	2	53		46		1	2	2	4	1	3	1	1	2	8	4	1	4
2	3	2	5	2		4		3	1	5	5	2	4	3	1	2	6	4	4	1
1	2	2	2	2		2		1	1	1	5	2	1	1	1	1	9	4	5	6
1	5	1	1	4		4		4	1	7	4	1	4	1	1	2	2	4	4	6
2	2	2	3	1		5	Coalition	1	1	1	5	2	6	1	1	2	-99	4	1	3
1	3	2	1	2		2		3	1	5	3	1	4	3	1	2	1	4	2	1
2	4	2	2	-98		-96		8	1	15	5	2	2	2	2	2	8	4	2	3
2	3	2	2	1		1		5	1	9	5	2	7	2	1	2	10	4	1	3
2	3	2	3	-99		-99		2	1	3	4	1	5	1	1	2	-99	4	3	5
1	4	2	1	1		1		1	1	1	2	2	6	3	1	2	10	4	6	1
2	3	2	2	2		2		1	1	1	5	2	4	1	1	2	10	4	9	3
3	4	4	3	1		38		4	1	7	1	1	4	1	1	1	2	4	4	1
1	3	2	2	4		4		4	1	7	5	2	6	2	1	2	-99	4	2	1
3	1	4	4	1		1		1	2	2	1	1	-97	1	1	2	11	4	4	5
1	3	2	2	4		4		1	2	2	1	2	4	1	1	2	8	4	1	3
2	2	4	3	2		2		2	1	3	2	2	3	1	1	2	6	4	2	6
1	4	1	2	1		1		2	1	3	5	1	6	3	1	2	6	4	1	1
2	3	2	2	2		2		2	1	3	3	2	3	1	1	2	5	4	2	3
1	4	2	1	4		4		2	1	3	5	1	3	1	1	2	10	4	4	3
1	3	2	2	1		1		2	1	3	5	1	4	1	1	2	5	4	4	1
2	3	2	6	-97		-97		5	1	9	1	1	5	1	1	2	10	4	1	7
2	2	2	3	1		1		3	2	6	3	1	6	1	1	2	2	4	2	1
1	4	1	1	4		4		3	1	5	5	1	4	3	1	2	-97	4	2	7
4	4	4	5	2		2		2	1	3	3	2	5	2	2	1	13	4	2	7
4	2	1	3	51		38		3	1	5	4	2	4	1	1	2	3	4	4	1
2	3	2	3	97		1		4	1	7	5	1	6	1	1	2	2	4	2	1
1	4	2	5	51		51		3	2	6	3	2	2	1	1	2	5	4	2	1
1	4	1	2	2		2		1	1	1	5	2	6	1	1	2	11	4	10	6
3	2	2	3	1		1		5	1	9	4	1	7	3	1	2	9	4	2	3
4	4	4	5	2		51		3	1	5	2	2	3	1	1	2	9	4	10	7
2	3	2	3	1		1		2	1	3	2	2	2	2	1	1	5	4	4	3
1	4	2	6	-97		-97		3	1	5	5	2	4	1	1	2	7	4	2	6
4	2	2	5	97		97		1	2	2	1	2	4	1	1	2	6	4	4	4
1	5	4	4	1		1		2	2	4	5	1	2	1	1	2	5	4	10	5
1	4	1	1	4		4		4	1	7	3	1	7	1	1	2	8	4	2	2
2	5	4	5	2		2		4	1	7	4	1	6	1	1	2	5	4	2	5
1	4	4	2	2		2		4	2	8	1	1	4	1	1	2	3	1	1	4
2	2	2	4	1		1		5	2	10	1	1	7	3	1	2	3	4	1	9
2	3	2	2	4		2		2	2	4	1	1	6	1	1	2	2	4	2	4
2	2	2	5	3		11		1	2	2	2	1	7	1	1	2	10	4	10	7
4	2	-98	5	1		1		4	2	8	3	1	7	1	1	2	9	4	9	-97
1	3	2	3	2		1		4	2	8	2	1	2	1	1	2	4	4	1	3
1	4	2	1	4		4		2	2	4	5	1	2	1	1	2	9	4	4	1
2	3	3	2	-97		-97		3	1	5	1	2	6	3	2	2	10	4	1	6
1	4	4	1	4		4		2	1	3	1	1	2	1	1	2	7	4	9	4
1	4	2	1	2		2		2	2	4	3	2	4	1	1	2	13	4	3	5
1	2	2	5	1		1		2	2	4	2	2	2	1	1	2	11	4	2	5
2	4	2	5	2		2		1	1	1	4	2	3	1	1	2	2	1	4	5
1	4	2	2	2		2		5	1	9	2	2	7	1	1	2	9	4	2	-97
3	5	2	2	1		1		2	1	3	4	1	7	1	1	2	7	4	1	5
2	3	2	2	1		1		1	2	2	1	2	4	1	1	2	7	4	5	4
2	3	2	3	1		2		5	1	9	1	1	6	2	1	2	8	4	1	5
2	4	1	2	1		1		1	1	1	5	2	1	1	1	2	12	4	5	6
1	3	1	2	1		1		5	1	9	5	2	5	2	1	2	8	4	1	1
1	4	1	1	4		4		4	1	7	5	1	6	1	1	2	7	4	1	1
1	2	2	5	4		4		2	1	3	4	1	4	1	1	2	10	4	3	5
1	4	1	1	2		2		2	1	3	3	1	1	1	1	2	13	4	10	6
1	4	2	2	2		2		5	1	9	2	2	5	2	1	1	11	4	2	7
3	4	4	3	2		2		3	1	5	1	1	2	1	1	2	14	4	6	3
1	4	2	2	1		1		5	2	10	2	1	4	2	1	2	5	4	4	1
1	3	2	6	1		1		1	2	2	2	2	2	3	2	2	6	4	2	6
2	2	2	2	-96		-96		3	1	5	4	2	3	2	2	1	12	4	4	3
2	5	1	1	-96		-96		2	1	3	2	2	3	2	2	1	4	4	4	1
1	4	2	1	4		4		2	1	3	4	2	1	2	1	2	14	4	7	6
2	4	2	5	1		1		3	1	5	3	2	3	2	1	1	6	4	10	1
3	1	4	5	1		1		1	2	2	3	1	7	1	1	2	11	4	2	-97
1	2	2	2	2		2		1	2	2	1	2	7	3	1	2	10	4	2	9
4	3	2	2	2		2		1	2	2	2	2	5	1	1	2	10	4	10	2
2	2	2	2	1		1		1	1	1	2	1	6	1	1	2	8	4	1	6
4	3	2	2	2		2		1	1	1	2	1	6	1	1	2	9	4	2	7
2	2	2	3	2		2		1	1	1	1	2	6	1	1	2	11	4	2	7
1	4	2	2	4		2		1	1	1	2	1	6	3	1	2	9	4	9	4
1	3	2	2	1		1		1	1	1	2	1	6	1	1	2	14	4	2	7
1	3	2	2	2		2		1	1	1	2	2	6	3	1	2	9	4	1	5
1	4	2	2	2		2		1	1	1	1	2	7	1	1	2	9	4	10	5
1	4	2	2	-99		-99		1	1	1	2	2	4	1	1	2	4	4	5	3
1	4	2	1	4		4		1	2	2	1	1	5	1	1	2	3	4	2	3
1	3	2	2	2		4		1	2	2	1	1	5	3	1	2	1	4	2	4
3	4	4	5	3		1		1	2	2	1	1	5	1	1	2	10	4	1	1
4	2	2	4	1		1		1	2	2	2	2	7	1	1	2	10	4	1	6
2	4	1	1	2		2		1	2	2	3	2	5	1	1	2	12	4	7	7
2	5	2	3	1		1		1	2	2	2	1	7	1	1	2	10	4	2	-97
4	2	4	5	1		38		1	1	1	4	2	4	1	1	2	9	4	4	5
2	2	2	3	1		2		1	1	1	5	2	3	1	1	2	11	4	3	4
1	3	2	2	1		1		1	1	1	3	2	6	1	1	2	10	4	2	4
1	3	2	1	-98		-98		1	1	1	5	2	7	1	1	2	10	4	1	3
1	4	1	2	2		2		1	1	1	3	2	6	1	1	2	10	4	2	3
2	2	4	5	2		2		1	2	2	2	1	5	1	1	2	10	4	1	5
4	2	4	5	-99		-99		1	2	2	2	2	4	1	1	2	3	1	7	1
3	3	2	3	3		1		1	2	2	2	1	7	1	1	2	7	4	2	-97
4	2	4	6	-97		-97		1	2	2	4	1	4	1	1	2	1	4	5	7
1	4	1	1	2		2		1	2	2	4	2	7	1	1	2	10	4	1	3
1	3	2	2	2		2		1	2	2	4	1	6	1	1	2	6	4	2	5
2	4	2	5	11		11		1	2	2	3	2	5	1	1	2	7	4	1	4
2	2	2	3	3		1		1	2	2	2	1	6	1	1	2	6	4	2	1
2	3	2	2	3		1		1	2	2	4	2	6	3	1	2	10	4	2	6
1	4	1	2	4		4		1	2	2	4	2	4	1	1	2	6	4	4	2
2	2	4	3	1		1		1	2	2	3	2	7	1	1	2	10	4	6	-97
3	2	4	4	1		1		1	2	2	4	1	5	1	1	2	7	4	2	5
1	3	2	2	2		4		1	2	2	4	1	6	1	1	2	7	4	1	2
2	3	2	6	-97		-97		1	2	2	3	2	7	1	1	2	10	4	2	7
3	2	4	5	1		1		1	2	2	3	2	6	1	1	2	11	4	1	7
1	4	2	2	4		32		1	2	2	2	2	4	1	1	2	4	4	10	1
1	3	2	5	2		2		1	2	2	3	2	6	1	1	2	11	4	2	7
4	3	1	2	2		1		1	2	2	2	1	1	1	1	2	13	4	4	4
2	5	2	3	1		1		1	2	2	3	1	7	1	1	2	-99	4	2	1
3	2	4	3	1		1		1	2	2	1	2	6	3	1	2	7	4	1	3
1	4	2	2	2		2		1	2	2	1	2	6	1	1	2	9	4	1	7
1	3	1	2	97		2		2	2	4	2	2	6	1	1	2	9	4	1	4
1	5	2	2	1		1		1	2	2	3	1	7	1	1	2	3	4	2	4
4	2	4	4	1		1		2	2	4	2	1	6	2	1	2	13	4	2	9
3	3	2	4	1		97		8	1	15	5	2	4	1	1	2	2	4	5	1
1	3	2	2	1		1		8	1	15	4	2	5	1	1	2	2	4	2	4
1	3	2	2	2		2		1	2	2	4	2	5	1	1	2	4	1	2	4
1	4	2	2	2		2		8	1	15	4	2	6	1	1	2	12	4	2	3
2	3	2	3	1		1		1	2	2	3	1	4	1	1	2	6	4	4	3
1	4	2	5	-99		-99		8	1	15	5	2	6	1	1	2	7	4	2	2
1	4	1	2	2		4		8	1	15	5	2	5	1	1	2	3	4	2	3
2	3	3	3	1		1		8	1	15	5	1	6	1	1	2	5	4	2	6
3	2	3	4	1		1		8	1	15	5	2	6	2	1	1	10	4	2	9
1	3	2	2	2		2		8	1	15	4	2	6	1	1	2	5	4	2	1
1	4	2	2	2		2		8	1	15	4	2	4	1	1	1	10	4	2	4
1	3	2	2	2		4		8	1	15	4	2	5	1	1	2	2	4	2	1
2	4	2	3	1		1		8	1	15	4	2	5	1	1	2	14	4	2	6
1	4	1	1	4		4		1	2	2	1	1	6	1	1	2	10	4	1	3
2	3	1	2	2		2		8	1	15	5	1	7	3	1	2	7	4	1	3
1	4	1	1	4		4		8	1	15	5	1	6	1	1	2	5	4	4	3
1	3	1	2	4		4		8	1	15	5	2	6	1	1	2	10	4	2	3
2	5	2	3	97		97		8	1	15	5	1	7	3	1	2	8	4	2	3
4	3	2	5	1		1		1	2	2	4	2	7	1	1	2	10	4	9	5
1	3	1	2	2		2		1	2	2	3	2	6	1	1	2	9	4	2	4
2	2	4	4	2		2		1	2	2	3	1	5	3	1	2	4	4	2	7
4	4	1	2	2		2		1	2	2	2	1	6	1	1	2	6	4	1	4
2	2	4	2	1		1		1	2	2	1	1	7	1	1	2	9	4	10	9
1	3	2	5	5	Minor party	5	Minor party	1	1	1	5	1	7	1	1	2	3	4	2	1
1	3	2	2	3		1		1	2	2	1	2	5	1	1	2	5	4	2	5
1	4	2	2	2		2		1	2	2	3	1	6	1	1	2	11	4	2	5
3	5	4	5	13		3		1	2	2	3	2	6	1	1	2	12	4	3	5
3	2	4	3	3		3		1	2	2	5	2	6	1	1	2	8	4	2	7
1	2	2	2	3		13		1	2	2	2	2	2	1	1	2	4	4	4	4
1	2	4	5	-97		11		1	2	2	2	2	7	3	2	2	11	4	2	7
1	4	2	1	4		2		1	2	2	1	2	5	1	1	2	4	4	7	3
1	2	3	5	1		1		1	2	2	1	2	7	1	1	2	10	4	2	3
2	4	4	4	-99		-99		1	2	2	1	2	5	1	1	2	7	4	1	4
3	2	4	4	11		46		1	2	2	3	1	4	1	1	2	9	1	1	7
3	2	2	4	3		1		1	2	2	3	2	6	3	1	2	8	4	1	3
2	4	2	3	2		2		1	2	2	3	2	3	1	1	2	5	4	4	3
1	4	2	2	97		2		1	2	2	3	2	6	1	1	2	10	4	9	1
1	4	2	1	2		2		1	2	2	2	1	7	1	1	2	10	4	2	3
3	5	2	3	3		3		1	2	2	2	1	6	1	1	2	7	4	1	1
2	4	2	2	4		2		1	2	2	1	2	4	1	1	2	8	4	3	5
1	4	1	1	-97		4		1	2	2	2	2	6	3	1	2	6	4	2	5
1	4	1	2	2		2		1	2	2	2	1	6	1	1	2	4	4	1	3
3	3	2	5	3		3		1	2	2	2	1	6	1	1	2	10	4	2	8
1	4	2	2	49		4		1	2	2	2	2	4	1	1	2	9	4	7	4
1	4	1	1	97		2		1	2	2	2	2	6	1	1	2	6	4	2	2
1	3	1	1	4		4		1	2	2	2	2	3	1	1	2	4	4	4	3
4	2	2	4	3		3		1	2	2	1	1	6	1	1	2	2	4	2	5
2	2	2	3	3		3		1	2	2	1	2	6	1	1	2	13	4	2	-97
1	2	2	1	3		3		3	1	5	2	2	6	2	1	1	10	4	1	4
1	4	1	1	2		2		1	2	2	3	2	6	1	1	2	7	4	2	3
2	2	2	2	1		1		1	2	2	3	2	6	1	1	2	5	4	10	7
2	4	4	6	-97		-97		1	2	2	3	2	6	1	1	2	8	4	3	7
2	2	4	5	3		1		1	2	2	4	2	7	1	1	2	5	4	1	3
1	4	2	2	2		2		1	2	2	1	1	4	2	1	2	3	4	5	3
2	2	2	3	1		3		1	2	2	3	1	6	1	1	2	8	4	1	-97
1	4	2	1	2		2		1	2	2	2	2	1	2	1	1	6	4	3	3
1	2	2	3	11		3		1	2	2	2	2	4	1	1	2	5	4	2	5
1	3	1	3	3		3		1	2	2	1	2	7	1	1	2	10	4	1	6
2	5	2	5	2		2		1	2	2	1	1	6	1	1	2	9	4	1	7
1	3	2	2	1		1		1	2	2	2	2	3	1	1	2	11	4	7	5
1	3	2	2	1		1		1	2	2	3	2	4	1	1	2	2	4	4	1
3	3	2	3	3		3		1	2	2	3	1	6	1	1	2	9	4	2	7
2	2	2	3	51		3		1	2	2	3	1	4	1	1	2	2	4	4	3
2	3	2	3	-98		-98		1	2	2	3	2	5	1	1	2	4	4	6	4
4	3	2	3	2		2		1	2	2	3	2	7	3	1	2	6	4	1	3
2	2	2	4	3		1		1	2	2	3	2	6	1	1	2	9	4	2	3
2	5	2	5	3		51		1	2	2	2	1	6	1	1	2	9	4	2	5
2	2	2	3	2		2		1	2	2	2	1	6	1	1	2	6	4	2	7
1	4	1	2	2		4		1	1	1	5	2	5	1	1	2	3	4	8	3
1	4	2	2	2		2		1	1	1	4	1	5	1	1	2	4	4	3	5
1	3	1	1	2		2		1	1	1	1	1	5	2	1	1	12	4	1	2
1	3	2	2	-96		-96		1	1	1	4	1	3	2	2	1	2	4	4	1
2	2	2	3	1		8		1	1	1	4	2	3	1	1	2	8	4	4	6
2	5	2	4	1		1		1	1	1	5	1	5	3	1	2	1	4	2	1
2	3	2	5	1		1		1	1	1	2	2	3	2	1	1	7	4	4	3
1	2	1	1	4		2		1	1	1	5	2	6	2	1	2	1	4	2	4
1	3	2	2	97		2		1	1	1	5	1	5	3	1	2	4	4	2	6
1	3	2	2	1		1		1	1	1	2	2	7	2	1	1	9	4	6	1
3	2	3	4	1		1		1	1	1	5	2	6	1	1	2	8	4	2	7
2	2	1	5	1		17		1	1	1	4	1	7	1	1	2	4	4	2	1
1	4	1	5	1		1		1	1	1	5	2	7	1	1	2	1	4	1	3
4	5	4	5	1		1		1	1	1	5	2	6	1	1	2	15	4	3	1
1	3	1	2	-97		-97		1	1	1	5	1	6	2	1	2	1	4	3	1
2	2	2	2	1		32		1	1	1	5	1	6	2	1	2	8	4	3	1
1	4	2	2	2		2		1	1	1	5	2	7	1	1	2	7	4	2	5
1	3	2	1	4		4		1	1	1	5	2	5	2	1	1	5	4	10	2
1	4	1	1	2		2		1	1	1	5	1	6	1	1	2	6	4	2	5
1	4	2	2	2		4		1	1	1	5	2	4	1	1	2	2	4	10	1
1	4	1	1	4		4		1	1	1	5	2	5	3	1	2	10	4	1	1
3	1	3	3	1		1		1	1	1	5	1	6	1	1	2	7	4	2	5
3	2	4	5	1		1		1	1	1	4	1	7	1	1	2	11	4	2	6
2	2	4	4	2		2		1	1	1	2	1	7	2	1	2	14	4	2	7
4	5	4	4	1		1		1	1	1	5	1	5	1	1	2	3	4	5	4
1	4	1	2	2		2		1	1	1	4	2	4	1	1	2	4	4	4	2
1	4	1	2	2		2		1	1	1	5	1	4	1	1	2	2	4	4	1
2	3	2	2	1		1		1	1	1	3	2	6	1	1	2	4	4	6	6
4	4	2	2	2		2		1	1	1	5	2	2	3	1	2	4	4	9	1
2	2	2	5	1		1		1	1	1	1	1	7	3	1	2	7	4	2	9
2	2	4	5	2		-98		3	2	6	1	2	2	1	1	2	14	4	7	9
3	3	2	3	1		1		1	1	1	3	1	6	1	1	2	4	4	3	4
1	3	2	2	1		1		1	1	1	1	1	6	1	1	2	13	4	3	7
3	3	4	4	2		2		1	1	1	1	1	4	1	1	2	14	4	4	7
1	4	2	1	4		4		1	1	1	5	2	6	1	1	2	13	4	2	4
1	2	4	3	1		2		1	1	1	4	2	7	3	1	2	10	4	1	9
1	2	2	2	97		1		1	1	1	4	1	6	2	1	1	9	4	2	4
4	3	2	2	2		2		1	1	1	4	1	6	3	1	2	6	4	2	3
1	3	2	2	4		4		1	1	1	2	2	7	1	1	2	10	4	6	3
1	4	1	2	2		2		1	1	1	5	1	7	3	1	2	5	4	2	3
2	2	4	3	1		1		1	1	1	2	1	5	1	1	2	-99	4	2	2
4	5	4	4	-97		11		1	1	1	3	2	4	1	1	2	9	4	6	3
2	3	4	4	2		2		1	1	1	1	1	3	2	1	1	6	4	4	3
1	4	2	2	2		4		1	1	1	5	2	6	1	1	2	10	4	1	2
4	3	4	4	1		1		1	1	1	5	1	4	1	1	1	14	4	4	4
4	2	4	4	1		1		1	1	1	5	1	4	1	1	2	1	4	8	1
2	2	4	5	1		1		1	1	1	5	2	5	2	1	1	9	4	5	6
1	2	2	5	2		2		1	1	1	2	2	5	1	1	1	15	4	3	4
2	2	4	2	1		1		1	1	1	4	1	6	1	1	2	10	4	10	5
1	5	2	3	1		1		1	1	1	1	1	4	2	1	1	-99	4	3	6
1	3	2	2	2		2		1	1	1	4	2	7	1	1	2	10	4	1	1
1	4	1	2	4		4		1	1	1	5	2	2	1	1	1	9	4	3	1
2	3	2	2	1		1		1	1	1	5	2	7	1	1	2	-99	4	1	4
3	3	-98	3	1		1		1	1	1	5	2	7	1	1	2	10	4	1	-97
3	5	2	5	1		1		1	1	1	1	1	5	3	2	2	11	4	2	6
1	4	2	1	2		2		1	1	1	4	2	7	1	1	2	-99	4	3	7
1	3	2	2	4		4		1	1	1	5	1	6	1	1	2	6	4	2	3
1	3	1	1	2		2		1	1	1	5	2	5	3	2	2	2	4	3	-97
3	1	4	3	1		13		1	1	1	5	1	4	1	1	2	2	4	4	5
4	4	2	5	2		2		1	1	1	4	2	5	1	1	2	10	4	1	9
2	3	2	3	1		1		1	1	1	5	2	5	1	1	2	6	4	2	7
1	3	2	2	97		97		1	1	1	4	1	3	1	1	1	12	4	1	6
2	3	3	3	1		1		1	1	1	5	2	6	1	1	2	10	4	1	5
4	3	2	2	97		1		1	1	1	5	1	7	3	1	2	6	4	2	2
2	2	2	3	1		1		1	1	1	5	2	6	1	1	2	5	4	4	5
3	1	4	4	1		1		1	1	1	5	1	6	1	1	2	2	4	2	1
3	5	2	4	97		2		1	1	1	5	1	5	3	1	2	2	4	2	7
1	3	2	3	1		1		1	1	1	4	2	5	1	1	2	10	4	1	7
1	4	1	2	1		1		1	1	1	5	2	4	1	1	2	12	4	4	1
2	2	2	2	2		2		1	1	1	5	2	7	1	1	2	10	4	2	7
1	4	2	2	2		2		2	2	4	1	2	3	1	1	2	11	1	4	7
4	5	4	4	1		1		2	2	4	1	1	7	1	1	2	6	4	2	4
1	4	1	1	2		2		2	2	4	2	1	7	1	1	2	7	4	1	3
3	5	4	2	3		1		2	2	4	4	1	7	1	1	2	9	4	2	9
1	3	2	1	4		4		2	2	4	2	2	5	1	1	2	8	4	7	3
2	2	4	5	-99		-99		2	2	4	3	2	5	1	1	2	10	4	3	5
1	4	2	2	2		2		2	2	4	1	2	6	1	1	2	10	4	1	2
2	2	2	4	2		2		2	2	4	4	1	7	1	1	2	12	4	2	5
2	3	2	5	4		41		2	2	4	1	2	5	1	1	2	10	4	2	2
2	3	2	5	1		1		2	2	4	5	2	6	3	1	2	6	4	2	2
3	5	4	4	1		1		2	2	4	4	1	7	1	1	2	10	4	2	6
1	4	4	2	1		4		2	2	4	4	1	4	1	1	2	10	4	2	3
1	2	3	2	-99		-99		2	2	4	1	2	6	1	1	2	8	4	1	5
1	2	2	1	1		-98		2	2	4	2	2	6	1	1	2	10	4	1	9
2	3	4	5	1		1		2	2	4	5	2	3	1	1	2	6	4	10	3
1	3	2	2	4		4		2	2	4	4	1	4	1	1	2	4	4	4	3
1	3	1	1	2		4		2	2	4	4	1	1	1	1	2	12	4	3	6
1	3	2	2	2		2		2	2	4	3	2	4	1	1	2	5	4	4	3
4	5	1	3	1		1		2	2	4	3	1	7	1	1	2	-98	4	2	-97
1	4	2	1	2		4		2	2	4	1	2	7	1	1	2	10	4	1	1
2	3	4	6	-96		-96		2	2	4	3	2	5	2	2	1	11	4	3	4
1	3	2	3	1		1		2	2	4	3	2	6	1	1	2	10	4	4	7
2	4	2	1	2		2		2	2	4	3	2	5	1	1	2	10	4	2	9
1	3	2	2	2		2		2	2	4	1	1	7	1	1	2	1	4	3	4
1	4	2	2	1		1		2	2	4	1	2	7	1	1	2	10	4	1	-97
2	2	2	4	2		2		2	2	4	5	2	5	1	1	2	7	4	2	3
2	4	2	5	15		23		2	2	4	2	1	3	1	1	2	-99	4	4	5
1	2	3	4	1		1		2	2	4	5	2	4	1	1	2	7	4	4	7
1	4	2	2	3		3		2	2	4	1	1	7	1	1	2	10	4	2	7
1	4	2	2	4		4		2	2	4	3	2	6	1	1	2	8	4	2	1
1	-98	4	3	1		-98		2	2	4	2	2	7	1	1	2	11	4	1	9
4	5	4	5	1		1		2	2	4	2	2	5	1	1	2	10	4	1	7
2	2	2	3	3		3		2	2	4	1	2	7	1	1	2	11	4	2	7
1	4	2	1	97		32		2	2	4	2	2	3	1	1	2	11	4	7	7
3	2	4	5	2		2		2	2	4	4	2	5	1	1	2	14	4	2	5
2	2	2	6	-96		-96		2	2	4	2	1	6	2	2	1	9	4	2	2
2	3	2	-98	1		5	Liberal/National	2	2	4	3	2	7	1	1	2	6	4	1	6
1	3	1	2	2		2		2	2	4	3	2	6	1	1	2	12	4	2	3
3	2	4	4	3		3		2	2	4	1	1	7	1	1	2	10	4	2	2
2	3	2	2	2		2		2	2	4	1	1	4	3	1	2	11	4	2	5
2	3	4	2	1		1		1	2	2	2	2	7	1	1	2	11	4	1	4
4	5	4	5	1		1		2	1	3	3	2	4	1	1	2	3	4	5	5
1	4	2	2	4		4		2	1	3	5	2	3	1	1	2	8	4	4	3
4	5	4	4	1		1		2	1	3	5	1	6	1	1	2	5	4	2	1
3	5	4	3	1		1		2	1	3	3	2	7	1	1	2	10	4	1	9
1	4	1	2	2		2		6	1	11	4	1	4	1	1	2	3	4	2	2
1	3	2	2	97		2		6	1	11	5	2	6	1	1	2	5	4	3	1
2	4	3	4	1		2		6	1	11	1	2	7	1	1	2	9	4	2	7
2	2	4	5	2		-98		6	1	11	1	2	5	1	1	2	8	4	1	5
1	4	1	2	2		4		6	2	12	2	1	3	3	1	2	1	4	2	2
3	4	2	5	1		1		6	1	11	1	2	6	1	1	2	14	4	2	-97
1	2	2	2	1		1		6	1	11	1	2	6	1	1	2	10	4	2	5
1	4	1	1	4		4		6	2	12	2	1	1	1	1	2	14	4	4	6
4	3	2	2	1		1		6	2	12	2	2	7	1	1	2	7	4	9	2
1	3	4	2	-99		-99		6	2	12	2	2	4	1	1	2	8	3	4	6
2	3	2	3	1		1		6	2	12	2	2	5	1	1	2	11	4	2	7
2	4	1	2	2		2		6	2	12	1	2	5	1	1	2	9	4	7	5
2	3	3	2	1		30		6	2	12	2	2	3	1	1	2	8	4	5	3
2	4	2	3	4		2		2	1	3	2	1	4	1	1	2	2	4	2	5
3	2	4	4	1		1		2	1	3	2	2	7	1	1	2	-99	4	1	9
3	3	4	5	1		1		2	1	3	1	2	5	2	1	1	11	4	7	6
1	3	1	2	2		2		2	1	3	5	1	6	1	1	2	3	4	1	3
4	2	2	5	1		1		2	1	3	5	2	6	2	1	1	-99	4	3	6
1	2	2	3	1		1		2	1	3	5	1	5	2	1	1	8	4	4	3
1	4	2	2	1		2		2	1	3	5	1	6	1	1	2	8	-98	2	6
1	3	2	2	2		2		2	1	3	1	2	6	2	1	1	10	4	1	4
1	3	1	2	4		2		2	1	3	2	2	5	1	1	2	14	4	1	3
1	4	2	5	1		1		2	1	3	4	1	4	1	1	2	1	4	5	4
1	4	2	2	2		97		2	1	3	5	2	7	1	1	2	7	4	1	5
2	2	2	3	1		1		2	1	3	2	2	7	1	1	1	10	4	2	7
1	4	2	2	2		2		2	1	3	4	2	6	1	1	2	4	4	1	2
4	2	4	5	-97		-97		2	1	3	5	1	7	1	1	2	13	4	2	-97
1	3	1	2	2		1		2	1	3	5	1	4	2	1	2	8	4	4	1
2	3	2	5	2		2		2	1	3	5	1	6	2	1	1	5	4	3	3
1	2	4	4	4		4		2	1	3	5	2	6	1	1	2	-99	4	2	2
1	4	2	2	1		1		2	1	3	5	2	6	1	1	2	6	4	1	3
-98	-98	4	5	1		-98		2	1	3	5	2	6	3	1	2	8	4	1	7
1	5	2	1	2		2		2	1	3	5	2	6	2	1	2	10	4	1	3
1	3	2	2	1		1		2	1	3	5	2	6	3	1	2	2	4	1	3
1	2	-98	2	-99		-99		2	1	3	1	2	4	1	1	2	7	4	7	2
2	2	4	4	1		1		2	1	3	5	2	4	1	1	2	1	4	3	3
1	4	1	2	2		2		2	1	3	5	2	6	1	1	2	2	4	2	3
1	2	2	2	2		23		2	1	3	5	2	7	3	1	2	-99	4	2	2
1	4	1	2	4		4		2	1	3	5	2	5	3	1	2	8	4	2	6
3	1	4	4	1		1		2	1	3	5	1	7	1	1	2	6	4	2	3
1	4	-98	2	1		1		2	1	3	5	1	6	2	1	1	10	4	2	5
1	2	1	1	2		2		2	1	3	4	2	5	1	1	2	12	4	4	3
4	2	2	2	1		1		2	1	3	4	1	6	1	1	2	3	1	4	6
2	2	2	2	-99		-99		2	1	3	4	1	6	1	1	2	10	4	2	7
1	2	2	2	2		2		2	1	3	3	2	7	1	1	2	10	4	1	4
1	3	2	2	2		2		2	1	3	4	1	5	1	1	2	2	4	5	5
1	2	2	2	97		97		2	1	3	4	1	6	1	1	2	9	4	9	2
1	4	2	2	4		4		2	1	3	5	2	5	1	1	2	-99	4	7	1
1	3	2	2	2		2		2	1	3	5	1	4	1	1	2	14	4	6	2
2	4	2	6	-96		-96		2	1	3	5	1	4	3	2	2	4	4	2	7
2	5	2	2	1		1		2	1	3	5	1	7	1	1	2	4	4	2	3
4	2	4	2	1		1		2	1	3	5	1	5	1	1	2	2	4	4	1
1	3	2	1	1		3		2	1	3	5	2	7	1	1	2	10	4	1	1
2	4	2	2	2		2		2	1	3	5	2	7	1	1	2	10	4	2	2
1	4	2	1	40		2		2	1	3	5	1	4	1	1	2	2	4	1	1
2	3	2	2	1		1		2	1	3	5	1	7	3	1	2	1	4	2	7
1	3	2	1	97		2		2	2	4	2	1	4	1	1	2	3	4	4	3
2	3	4	4	1		1		2	1	3	4	2	7	2	1	2	7	4	1	-97
4	2	2	3	1		1		2	1	3	4	2	7	1	1	2	5	4	2	7
1	4	2	1	2		4		2	1	3	4	2	3	1	1	2	14	4	4	6
2	3	2	6					2	1	3	5	2	4	2	2	2	15	4	2	4
1	4	2	2	2		2		2	1	3	4	1	6	2	1	2	13	4	3	9
1	3	2	1	-96		-96		2	1	3	3	1	1	2	2	1	14	4	1	6
1	4	1	2	2		2		3	1	5	2	2	4	1	1	2	3	4	4	3
3	2	3	3	2		2		3	1	5	1	1	2	3	2	2	6	4	4	6
1	3	2	1	2		2		3	1	5	4	2	7	1	1	2	10	4	1	3
1	4	2	2	1		1		3	1	5	5	1	6	3	1	2	4	4	2	4
2	3	4	2	2		2		3	1	5	5	1	6	1	1	2	13	4	4	5
1	4	1	1	4		4		1	2	2	2	1	3	3	1	2	6	4	4	3
3	2	4	4	51		51		3	1	5	1	1	6	1	1	2	5	4	3	5
3	2	4	5	3		1		3	1	5	4	1	7	3	1	2	10	4	1	5
1	4	3	5	-99		-99		3	1	5	4	2	4	1	1	2	9	4	7	2
2	3	4	2	1		1		3	1	5	5	2	4	1	1	2	8	4	4	4
3	3	2	3	-99		-99		3	1	5	4	1	6	1	1	2	-99	4	2	1
1	3	2	2	1		4		3	1	5	5	2	4	3	1	2	6	4	4	6
2	-98	-98	-98	-97		-97		3	1	5	4	2	5	1	1	2	14	4	3	7
1	4	2	2	2		4		3	1	5	4	2	4	1	1	2	6	4	9	1
1	4	2	5	-98		-98		3	1	5	4	1	5	1	1	2	12	4	1	2
1	4	2	2	1		6		3	1	5	2	2	5	1	1	2	10	4	3	4
4	2	4	4	1		1		3	1	5	2	1	7	3	1	2	7	4	2	5
3	2	4	4	51		51		3	1	5	5	1	6	1	1	2	1	4	2	1
4	2	4	5	11		11		3	1	5	5	1	5	2	1	2	6	4	2	4
3	2	4	5	1		1		3	1	5	4	1	4	1	1	2	10	4	2	5
1	4	2	5	1		1		3	1	5	4	1	7	1	1	2	9	4	1	1
3	5	4	3	51		51		3	1	5	4	1	5	1	1	2	4	4	2	5
1	3	2	3	1		1		3	1	5	4	2	6	1	1	2	10	4	1	7
4	3	1	1	4		4		3	1	5	5	2	6	3	1	2	6	4	2	6
3	4	4	3	1		1		3	1	5	4	1	6	1	1	2	10	4	3	7
1	2	2	2	1		1		3	1	5	5	2	5	1	1	2	14	4	3	7
2	3	2	3	1		1		3	1	5	5	1	6	1	1	2	6	4	1	4
3	5	4	5	1		1		3	1	5	4	2	7	1	1	2	10	4	6	9
-98	2	-98	5	51		51		3	1	5	5	2	7	2	1	2	10	4	1	-97
1	4	2	2	2		4		3	1	5	5	1	7	3	2	2	7	4	1	3
2	2	2	5	-99		-99		3	1	5	5	2	6	1	1	2	7	4	1	4
2	2	3	3	4		2		3	1	5	3	2	5	3	1	2	8	4	1	4
1	4	2	2	2		2		3	1	5	1	2	5	1	1	2	10	4	2	2
1	1	2	3	2		2		3	1	5	3	2	2	2	1	2	1	4	2	9
1	4	2	2	1		1		3	1	5	5	2	6	1	1	2	8	4	1	6
1	4	3	6	51		51		3	1	5	3	1	3	1	1	1	11	4	2	8
2	2	2	5	2		2		3	1	5	1	1	4	1	1	2	12	4	1	6
1	2	2	6	-96		-96		3	1	5	3	2	3	3	2	2	8	4	4	5
1	-98	2	5	1		1		3	1	5	3	2	6	1	1	2	2	4	1	1
1	4	2	1	4		4		3	1	5	5	2	5	1	1	1	5	4	1	2
1	4	2	1	2		4		3	1	5	4	2	6	1	1	2	8	4	1	1
1	3	2	1	2		2		3	1	5	5	2	6	1	1	2	5	4	1	3
1	3	3	3	1		1		3	1	5	5	1	5	3	1	2	3	4	2	4
1	2	3	2	2		2		3	1	5	5	2	4	1	1	2	8	4	4	6
2	2	3	3	1		1		3	1	5	2	2	6	3	2	2	14	4	10	6
1	3	4	5	-99		-98		3	1	5	4	2	6	1	1	2	8	4	1	7
1	4	2	2	2		5	Conservative	3	1	5	4	1	6	1	1	2	2	4	2	1
3	1	4	5	1		11		3	1	5	4	2	5	2	1	2	11	4	2	6
1	5	2	2	1		2		3	2	6	2	1	6	1	1	2	10	4	2	6
2	2	2	2	1		2		3	2	6	2	2	4	1	1	2	2	4	3	1
3	5	4	5	51		1		3	2	6	1	1	5	1	1	2	5	4	1	3
2	2	4	5	1		1		3	2	6	2	2	6	1	1	2	10	4	1	3
3	2	2	5	51		51		3	2	6	1	2	4	1	1	2	5	4	2	6
1	5	2	1	2		2		3	2	6	1	2	4	1	1	2	11	4	9	5
1	3	2	2	1		1		3	2	6	1	2	6	1	1	2	-99	4	1	-97
1	4	4	5	1		1		3	2	6	1	2	5	3	2	2	7	4	4	5
1	3	1	2	2		2		3	2	6	4	1	4	1	1	2	2	4	3	4
2	2	2	2	1		1		3	2	6	1	2	5	1	1	2	13	4	4	7
1	2	4	5	60		60		3	2	6	1	1	5	1	1	2	11	4	1	2
2	3	2	5	1		1		3	2	6	1	2	6	3	1	2	9	4	10	6
4	3	2	2	2		2		3	2	6	2	2	6	1	1	2	8	4	2	3
1	4	2	2	1		1		3	2	6	3	1	3	1	1	2	1	4	4	3
4	2	4	4	51		38		3	2	6	3	2	4	1	1	2	9	4	2	1
1	4	1	1	2		4		3	2	6	3	2	6	1	1	2	7	4	2	1
1	4	1	2	2		2		3	2	6	3	2	7	1	1	2	9	4	1	3
4	2	2	4	3		3		1	2	2	1	2	4	3	2	2	8	4	4	6
1	3	2	5	51		51		3	2	6	1	2	7	1	1	2	10	4	2	7
4	2	4	5	1		1		3	2	6	1	1	6	1	1	2	10	4	1	5
2	3	2	3	1		1		3	2	6	3	2	6	1	1	2	10	4	1	5
1	3	1	2	2		4		3	2	6	3	2	2	1	1	2	8	4	5	3
4	5	4	2	16		16		3	2	6	3	1	3	1	1	2	4	4	4	3
4	2	4	4	16		51		3	2	6	2	2	4	1	1	2	14	4	4	2
3	3	2	4	51		51		3	2	6	3	2	4	1	1	2	7	4	4	6
2	5	2	3	2		2		3	2	6	3	1	2	1	1	1	3	4	10	3
1	2	2	1	2		2		3	2	6	4	1	6	1	1	2	6	4	1	7
2	3	4	3	-97		-97		3	1	5	1	2	4	1	1	2	9	4	3	7
3	2	4	5	15		15		3	2	6	4	1	3	1	1	2	7	4	2	5
2	4	2	2	2		4		3	2	6	3	1	6	1	1	2	10	4	9	2
2	2	2	3	51		51		3	2	6	2	2	7	1	1	2	10	4	2	2
1	2	2	5	4		4		3	2	6	4	2	7	1	1	2	9	4	1	7
2	3	2	5	97		2		3	2	6	3	2	5	1	1	2	7	4	2	3
1	3	2	6	-96		-96		3	1	5	1	2	5	2	2	2	8	4	3	4
3	2	2	4	3		51		3	1	5	1	2	6	1	1	2	12	4	2	2
2	4	2	2	2		2		3	1	5	2	1	3	1	1	2	11	1	4	5
2	2	3	3	1		2		3	2	6	4	1	4	1	1	2	7	1	2	5
1	3	4	1	4		2		3	2	6	3	2	6	1	1	2	10	4	2	1
1	4	2	2	2		3		3	2	6	3	2	6	1	1	2	10	4	1	2
1	2	2	2	-99		-99		3	2	6	3	2	7	1	1	2	15	4	2	3
2	5	2	2	2		2		3	1	5	1	2	6	1	1	2	10	4	2	7
1	3	1	2	2		2		3	1	5	1	1	4	3	1	2	2	4	4	1
2	4	2	5	51		51		3	1	5	1	1	5	1	1	2	8	4	3	5
2	3	2	5	51		51		3	1	5	2	1	6	1	1	2	-98	4	3	3
4	4	1	1	2		4		3	1	5	2	1	5	1	1	2	13	4	2	4
1	4	2	2	51		51		3	1	5	2	2	5	3	1	2	14	4	2	5
3	3	4	3	1		1		3	1	5	5	1	6	1	1	2	6	4	2	7
2	5	4	5	1		1		3	2	6	4	1	6	1	1	2	7	4	2	2
2	3	2	6	-97		-97		1	2	2	1	1	6	3	1	2	8	4	1	5
1	3	2	4	51		51		3	2	6	2	2	6	1	1	2	-99	4	1	1
1	4	1	1	2		4		1	1	1	5	2	6	1	1	2	4	4	2	1
2	2	2	2	2		4		3	2	6	5	1	5	1	1	2	11	4	4	4
1	3	2	1	97		4		3	2	6	4	1	6	1	1	2	6	4	2	2
1	3	2	5	2		2		3	2	6	4	2	5	1	1	2	5	4	1	5
2	4	4	5	51		51		3	2	6	4	2	5	1	1	2	8	4	10	6
1	3	2	2	2		4		3	2	6	4	1	6	1	1	2	3	4	2	3
2	3	2	3	1		1		3	2	6	4	2	6	1	1	2	9	4	1	3
2	3	3	4	3		3		1	2	2	2	2	6	1	1	2	10	4	9	6
4	4	2	2	2		2		3	2	6	4	2	6	1	1	2	11	4	1	7
1	4	2	2	97		4		3	2	6	4	1	4	1	1	2	2	4	4	2
2	3	2	2	2		2		3	2	6	4	1	6	1	1	2	10	4	2	1
1	3	2	2	4		97		3	2	6	2	2	6	1	1	2	7	4	1	3
1	4	4	2	51		51		3	2	6	3	2	5	3	2	2	10	4	3	9
1	4	2	2	4		4		3	2	6	2	2	6	3	1	2	10	4	10	3
2	3	2	6	-97		-97		5	1	9	1	2	3	3	2	1	8	4	7	6
1	4	2	5	2		2		5	1	9	5	1	3	3	2	2	3	4	4	5
3	2	4	3	-99		1		4	1	7	2	2	4	1	1	2	8	4	7	4
1	3	2	2	2		2		4	1	7	5	1	3	1	1	2	2	4	4	2
2	2	3	5	-99		-99		4	1	7	2	1	5	1	1	2	6	4	1	5
2	2	4	5	-99		-99		4	1	7	4	2	6	1	1	2	13	4	2	7
2	4	2	5	2		2		4	1	7	1	2	4	3	1	2	12	4	6	7
2	3	2	2	15		15		4	1	7	4	1	7	3	1	2	8	4	1	5
2	2	3	5	15		15		4	1	7	4	2	5	1	1	2	8	4	7	7
4	5	4	4	1		1		2	2	4	1	1	5	1	1	2	2	4	4	4
1	5	4	3	1		2		4	1	7	1	2	6	2	1	2	10	4	1	6
2	5	3	4	1		1		4	1	7	3	2	6	3	1	1	15	4	1	7
4	2	4	5	1		38		4	1	7	2	1	4	1	1	2	4	4	4	5
-98	-98	2	1	3		3		4	1	7	2	2	7	1	1	2	10	4	1	9
1	3	2	3	2		2		4	1	7	1	2	2	1	1	2	6	4	4	6
1	4	1	1	4		4		4	1	7	3	2	6	1	1	2	7	4	9	2
2	3	2	3	1		1		4	1	7	3	1	6	1	1	2	13	4	2	4
1	3	2	2	1		1		4	1	7	4	2	7	1	1	2	12	4	2	1
1	4	2	2	2		4		4	1	7	5	2	7	1	1	2	6	4	1	4
2	2	-98	2	-99		-99		4	1	7	2	1	4	1	1	2	6	4	9	4
2	2	2	2	-99		-99		4	1	7	4	2	4	1	1	2	-99	4	4	6
1	3	2	2	1		4		4	1	7	4	2	4	1	1	2	13	4	4	3
2	2	2	2	1		1		4	1	7	3	2	7	1	1	2	9	4	1	9
1	4	2	1	24		24		4	1	7	5	1	7	2	1	2	9	4	2	6
2	2	2	3	1		1		4	1	7	1	2	7	2	1	2	9	4	1	5
1	2	2	2	2		2		4	1	7	4	1	2	1	1	2	9	4	3	4
2	2	2	2	1		1		4	1	7	4	2	5	2	1	1	10	4	2	7
3	2	4	6	-97		-97		4	1	7	3	2	7	3	1	2	10	4	1	9
1	4	4	5	1		1		4	1	7	5	1	6	3	1	2	8	4	2	6
3	5	2	4	1		1		4	1	7	2	2	5	1	1	1	8	4	2	2
3	2	4	5	1		1		4	1	7	3	1	6	1	1	2	14	4	3	5
1	3	2	2	1		24		4	1	7	1	2	6	1	1	2	5	4	1	3
4	5	4	5	2		2		4	1	7	5	1	5	1	1	2	6	4	2	5
2	3	2	5	24		24		4	1	7	5	2	6	1	1	2	13	4	2	4
2	3	2	2	-96		-96		4	1	7	3	2	3	2	2	1	13	4	4	2
1	3	2	2	-97		2		4	1	7	5	1	6	1	1	2	9	4	2	6
1	3	1	2	4		4		4	1	7	4	2	4	1	1	2	12	4	1	7
4	3	2	5	1		1		4	1	7	4	2	7	3	1	2	10	4	1	5
1	4	1	1	4		4		4	1	7	3	1	2	1	1	2	5	4	9	5
1	3	2	5	1		1		4	2	8	1	2	6	1	1	2	10	4	1	3
1	4	2	1	24		-98		4	2	8	2	2	6	1	1	2	10	4	1	1
2	2	2	5	1		1		4	2	8	2	1	6	1	1	2	5	4	1	5
2	2	2	3	1		1		4	2	8	1	1	7	1	1	2	10	4	2	9
1	2	4	5	5	the Australian party	5	The Australian Party	4	2	8	1	2	6	1	1	2	10	1	6	2
3	5	4	4	1		1		4	2	8	1	1	7	1	1	2	1	4	1	4
2	2	2	2	1		1		4	2	8	3	1	6	1	1	2	8	4	2	9
2	5	2	3	1		1		4	2	8	3	2	5	1	1	2	9	4	3	4
4	5	3	4	1		1		4	2	8	3	1	5	1	1	2	2	4	3	4
1	4	1	1	-97		-97		7	1	13	3	2	4	1	1	2	8	4	3	6
1	4	4	1	4		4		7	2	14	4	1	6	3	2	2	6	4	2	5
1	4	2	1	44		-97		7	2	14	1	2	6	1	1	2	11	4	1	3
3	2	2	4	1		1		7	1	13	5	1	6	1	1	2	1	4	2	3
2	3	4	5	-99		-99		5	2	10	3	2	5	1	1	2	7	4	2	5
1	5	1	1	4		28		5	2	10	1	1	3	1	1	2	2	4	4	3
2	2	2	5	1		1		5	1	9	5	2	7	2	1	2	10	4	3	6
2	2	2	3	1		1		5	1	9	3	2	6	1	1	2	14	4	2	7
2	4	3	2	1		1		5	1	9	3	2	7	2	1	1	-98	4	2	9
3	2	4	4	1		1		5	1	9	5	1	4	1	1	2	2	4	4	4
1	4	2	2	2		2		5	1	9	4	1	4	1	1	2	6	4	4	5
1	4	2	1	-97		-97		5	1	9	5	2	4	3	2	2	10	4	3	6
2	3	4	5	1		1		5	1	9	3	2	6	3	1	2	11	4	2	4
1	4	2	2	-97		-97		5	1	9	4	2	6	3	1	2	6	4	2	6
2	5	4	3	1		1		5	1	9	5	1	5	1	1	2	6	4	3	7
1	4	2	5	1		1		5	1	9	5	2	6	2	1	2	10	4	1	3
1	4	1	1	1		-98		5	1	9	5	2	7	3	1	1	11	4	2	6
2	2	2	1	1		1		5	1	9	5	2	7	1	1	2	6	4	1	7
2	3	3	2	-99		-99		5	1	9	1	2	7	1	1	2	10	4	1	3
1	2	2	2	-99		-99		5	1	9	4	2	6	1	1	1	10	4	1	4
3	2	2	3	1		1		5	1	9	2	1	5	1	1	2	1	4	2	4
1	3	2	2	4		4		5	1	9	4	2	6	1	1	2	9	4	1	1
1	1	2	1	2		-98		5	1	9	4	1	4	1	1	1	7	4	4	7
1	4	2	1	2		4		5	1	9	5	1	5	1	1	2	10	4	10	1
1	4	2	2	2		2		5	1	9	5	1	5	1	1	2	2	4	3	2
1	2	2	1	1		1		5	1	9	2	1	5	1	1	2	10	4	10	7
2	3	2	3	1		1		5	1	9	5	1	6	1	1	2	6	4	2	1
1	4	1	2	1		1		5	1	9	5	2	7	3	1	2	5	4	10	1
2	2	2	5	1		1		5	1	9	3	1	3	1	1	2	6	4	4	6
2	2	3	2	1		1		5	1	9	3	2	7	3	1	2	9	4	7	4
1	4	2	2	2		2		5	1	9	2	2	6	2	1	2	7	4	2	7
1	3	2	2	15		15		5	1	9	3	1	7	1	1	2	11	4	2	4
1	2	2	2	2		2		5	1	9	4	2	5	3	1	2	5	4	1	7
1	5	2	2	4		4		5	1	9	4	1	5	1	1	2	4	4	2	5
2	3	2	2	4		4		5	1	9	4	1	4	3	1	2	9	4	1	2
2	4	2	5	1		1		5	1	9	4	2	7	1	1	2	10	4	1	6
2	3	2	3	-99		-99		5	1	9	5	2	5	1	1	2	-99	4	4	1
1	4	2	2	1		1		5	1	9	5	2	2	1	1	2	8	4	2	3
1	4	1	2	4		4		5	2	10	4	1	6	3	1	2	6	4	2	1
2	2	2	6	-97		-97		5	1	9	5	1	6	3	1	2	9	4	2	2
1	4	2	5	4		4		5	1	9	4	2	7	2	1	2	8	4	1	5
2	5	4	4	1		1		5	1	9	5	1	6	2	1	2	13	4	2	4
2	3	2	5	1		1		5	1	9	2	2	6	2	1	2	8	4	5	9
2	3	2	3	2		1		5	1	9	3	2	4	1	1	2	8	4	4	4
2	3	2	2	1		1		5	1	9	5	2	6	3	1	2	7	4	2	5
1	3	1	1	2		2		5	1	9	3	1	6	3	2	2	10	4	1	6
3	3	2	4	1		3		5	1	9	2	2	6	1	1	2	8	4	2	6
1	5	2	2	1		3		5	1	9	1	1	5	3	1	2	2	4	1	4
1	3	2	5	2		2		5	1	9	2	2	6	1	1	2	10	4	10	4
2	4	2	2	1		1		5	1	9	2	2	4	2	1	2	11	4	4	3
3	2	4	4	1		38		5	1	9	2	2	4	1	1	2	8	4	7	7
2	3	2	2	11		11		5	2	10	3	1	7	1	1	2	10	4	1	7
2	5	2	5	1		1		5	2	10	3	1	7	1	1	2	10	4	1	7
2	1	4	2	1		1		5	2	10	2	2	6	1	1	2	8	4	2	6
2	3	2	3	3		3		5	2	10	1	1	7	1	1	2	9	4	1	4
3	3	4	5	65		1		5	2	10	1	2	6	1	1	2	11	4	2	6
3	2	3	3	1		3		2	2	4	2	1	6	1	1	2	11	4	6	5
3	2	4	4	3		3		1	2	2	3	2	6	1	1	2	12	4	2	4
1	3	2	2	2		2		2	1	3	1	2	2	1	1	2	5	4	2	3
1	4	3	1	2		4		3	1	5	4	2	5	1	1	2	7	4	6	6
2	4	2	6	-96		-96		3	1	5	2	2	3	3	2	1	9	4	7	7
2	2	4	4	1		1		5	1	9	5	2	6	1	1	2	10	4	1	-97
1	5	2	2	2		11		1	1	1	2	1	3	1	1	2	1	4	2	4
1	3	3	2	2		2		2	2	4	4	2	3	1	1	2	8	4	4	5
2	2	4	2	1		1		2	1	3	1	1	7	3	1	2	10	4	1	6
4	4	4	4	1		1		1	1	1	2	1	4	1	1	2	5	4	2	7
2	3	2	2	2		2		2	1	3	2	2	5	1	1	2	4	4	6	3
1	3	2	2	2		2		1	1	1	5	2	2	1	1	2	3	4	6	3
2	2	2	5	97		97		2	2	4	4	1	3	1	1	2	6	4	10	4
1	3	2	2	2		2		5	2	10	4	2	5	2	1	2	2	4	2	2
2	2	4	5	1		1		2	2	4	2	2	6	1	1	2	10	4	1	4
1	3	2	2	4		4		4	1	7	3	2	2	1	1	2	4	4	2	3
3	3	2	2	1		1		3	2	6	3	1	7	1	1	2	9	4	2	8
4	2	4	4	1		1		5	1	9	5	1	4	3	1	2	8	4	7	3
1	4	1	1	4		4		8	1	15	4	1	4	1	1	2	14	4	1	5
1	4	2	6	-96		-96		5	1	9	3	2	4	2	2	2	3	4	2	1
4	2	4	4	1		1		5	1	9	5	1	5	1	1	2	1	4	3	4
2	3	2	2	-99		-99		3	1	5	5	1	5	3	1	2	1	4	1	4
1	4	2	2	1		1		5	1	9	5	2	2	1	1	2	5	4	4	5
1	3	2	3	1		1		1	1	1	1	1	5	2	1	1	6	4	6	2
1	4	1	2	4		4		5	1	9	5	1	4	3	1	2	4	4	4	6
1	3	2	2	2		-98		1	2	2	1	2	6	1	1	2	10	4	1	-97
1	3	2	2	24		2		4	1	7	5	1	4	1	1	1	1	4	2	1
2	3	2	6	-96		-96		3	2	6	4	1	5	3	2	2	5	4	2	6
2	2	2	3	38		38		2	2	4	3	1	4	1	1	2	2	4	5	2
1	3	4	5	1		1		2	1	3	5	1	4	1	1	1	9	4	4	5
1	3	2	2	2		2		3	2	6	2	2	5	1	1	2	10	4	2	4
4	3	4	2	2		2		2	1	3	5	1	7	2	1	2	10	4	6	9
4	4	2	5	15		1		1	2	2	2	1	2	1	1	2	6	1	2	3
2	2	2	2	5	Christian	4		3	1	5	1	2	2	1	1	2	7	4	7	5
1	3	2	2	2		2		1	2	2	3	2	7	1	1	2	10	4	2	4
3	2	2	5	2		2		2	2	4	4	2	4	1	1	2	13	4	2	5
1	4	2	2	4		4		2	1	3	4	2	4	1	1	2	7	4	3	5
2	2	2	5	1		51		3	1	5	4	2	6	1	1	2	7	4	2	5
1	3	2	2	2		2		1	1	1	1	2	1	1	1	1	11	4	7	6
1	4	3	2	2		2		1	1	1	5	1	2	2	1	1	2	4	4	4
3	5	4	5	1		1		1	1	1	1	2	7	1	1	2	10	4	6	-97
1	2	2	1	1		1		1	1	1	4	1	5	2	1	1	4	4	5	3
1	3	1	1	2		4		1	1	1	3	2	4	1	1	2	5	4	4	6
2	3	2	3	2		2		1	2	2	5	1	4	1	1	2	2	4	5	5
1	4	2	6	-96		-96		2	2	4	4	2	5	3	2	2	6	4	2	6
1	4	2	2	2		2		1	2	2	2	1	6	1	1	2	11	4	2	4
2	4	2	3	51		51		3	1	5	1	2	3	1	1	2	12	4	4	4
1	4	2	2	1		1		2	1	3	4	2	6	1	1	2	9	4	2	4
1	3	3	3	1		1		4	1	7	4	1	5	1	1	2	6	4	3	1
2	5	4	2	-97		1		2	2	4	1	1	2	1	1	2	1	4	7	8
1	3	2	4	1		1		5	1	9	4	1	2	3	1	2	7	4	2	5
2	4	2	3	1		1		7	1	13	4	2	6	1	1	2	-99	4	3	-97
2	2	2	3	2		23		2	1	3	5	1	3	2	1	2	-99	4	1	1
1	4	2	1	4		4		3	2	6	3	1	1	1	1	2	12	4	2	6
2	4	2	1	-96		-96		5	1	9	1	1	2	2	2	1	11	4	1	1
1	4	2	2	2		1		2	2	4	2	2	5	1	1	2	14	4	4	1
1	4	2	2	1		1		1	2	2	4	2	2	1	1	2	3	4	4	3
1	3	1	2	1		1		1	1	1	5	1	2	2	2	1	6	4	2	3
2	2	2	2	1		1		1	1	1	3	1	4	2	1	1	4	4	3	6
2	2	2	3	51		51		3	1	5	5	2	6	1	1	2	12	4	2	7
1	4	1	6	-96		-96		3	1	5	5	2	3	2	2	2	5	4	2	6
1	4	4	2	-99		-99		2	1	3	5	1	-97	1	1	2	14	4	4	4
1	3	2	5	2		2		2	1	3	5	2	2	1	1	2	5	4	4	3
1	4	2	2	-99		-99		3	1	5	5	2	4	1	1	2	-99	4	4	3
2	3	2	5	-99		-99		5	1	9	5	2	4	1	1	2	6	4	7	5
1	4	2	2	2		4		1	1	1	5	2	5	1	1	2	2	4	3	4
2	5	2	3	1		1		2	2	4	3	1	5	1	1	2	6	4	4	5
1	4	2	2	2		2		2	1	3	3	2	5	3	1	2	6	4	2	1
1	3	2	5	1		1		3	1	5	5	2	2	1	1	2	5	4	2	3
2	4	2	5	11		11		3	2	6	3	2	5	1	1	2	7	4	2	7
1	4	2	2	2		2		2	1	3	4	2	3	1	1	2	6	4	4	3
1	4	2	3	2		2		1	2	2	1	1	5	1	1	2	5	4	3	3
1	4	1	2	2		2		8	1	15	4	1	3	1	1	2	1	4	4	1
1	4	2	6	-96		-96		2	1	3	2	2	3	3	2	2	7	4	2	4
3	2	4	4	1		1		1	1	1	2	2	6	1	1	2	15	4	2	7
1	3	2	1	2		2		3	1	5	2	1	4	1	1	2	4	4	2	3
2	3	2	2	2		4		5	1	9	5	1	3	1	1	2	5	4	4	5
2	2	4	5	2		2		4	1	7	1	2	6	1	1	2	8	4	6	5
1	4	2	6	-96		-96		1	1	1	3	2	2	2	2	1	5	4	9	3
1	4	2	1	-96		-96		3	1	5	4	1	3	2	2	1	10	4	4	1
2	3	4	5	-97		-97		1	1	1	1	2	2	1	1	2	8	4	2	5
1	4	1	2	1		1		1	1	1	3	2	3	1	1	2	7	4	4	1
1	3	2	2	2		4		1	1	1	5	2	4	2	1	2	2	4	4	3
1	4	2	5	-97		-97		3	2	6	3	1	2	3	2	2	10	4	9	7
2	3	2	3	32		-97		1	2	2	3	2	5	1	1	2	4	4	1	3
1	4	2	2	3		3		1	2	2	3	2	4	1	1	2	5	4	3	5
1	4	2	2	2		2		1	1	1	5	2	7	1	1	2	10	4	2	4
3	4	3	5	4		4		1	1	1	1	1	1	2	1	1	12	4	9	6
1	4	2	2	2		2		2	2	4	3	2	3	1	1	2	-99	4	4	1
2	3	2	2	2		2		2	2	4	5	2	6	1	1	2	3	4	2	1
2	4	2	5	-99		-99		1	1	1	5	1	2	2	1	1	3	4	2	3
2	2	2	5	1		1		1	1	1	1	2	4	1	1	2	1	4	4	2
2	4	2	5	36		36		4	1	7	1	1	6	3	1	1	7	4	2	2
1	4	1	2	2		2		4	1	7	5	1	4	1	1	2	2	4	4	5
1	4	2	2	8		8		1	1	1	2	1	5	1	1	2	3	4	5	1
2	5	4	4	1		1		4	1	7	4	2	6	1	1	2	10	4	1	7
1	4	2	1	2		4		2	1	3	3	1	3	1	1	2	8	4	2	3
2	3	3	2	1		1		1	2	2	3	1	3	1	1	2	8	4	3	7
3	2	4	4	1		1		1	1	1	3	2	3	2	1	1	1	4	4	3
1	4	1	1	2		2		2	1	3	4	2	2	1	1	2	5	4	4	2
1	2	2	2	15		51		3	2	6	2	1	3	1	1	2	-98	4	2	5
2	2	2	5	15		-98		1	1	1	4	1	5	1	1	2	4	4	2	3
2	3	2	3	1		1		4	1	7	3	1	5	1	1	2	3	4	3	5
1	4	3	6	-97		-97		3	2	6	3	2	4	3	2	2	9	4	1	2
1	4	1	1	-96		-96		2	2	4	3	1	3	3	2	2	2	4	4	2
3	3	4	6	-96		-96		3	1	5	5	1	4	2	2	2	2	4	4	3
1	4	2	1	4		4		1	1	1	1	2	5	1	1	2	7	4	3	1
2	5	2	2	2		2		4	1	7	1	2	3	1	1	2	10	4	2	4
3	3	2	4	1		1		2	2	4	5	1	4	1	1	2	1	4	4	1
1	3	2	2	2		1		4	2	8	1	1	7	3	1	2	9	4	1	6
1	4	2	1	4		4		5	1	9	3	2	2	1	1	1	4	4	2	3
1	4	1	2	4		4		3	2	6	3	2	3	3	1	2	13	4	4	3
1	3	2	2	97		5	Christian group	2	1	3	5	2	3	1	1	1	6	4	3	3
2	3	2	2	1		1		2	1	3	4	1	3	2	1	1	2	4	4	3
1	4	2	1	2		2		1	1	1	4	2	1	2	1	1	6	4	4	6
2	2	4	5	32		32		4	1	7	2	2	5	1	1	2	10	4	4	6
4	3	2	5	2		1		2	1	3	5	2	3	1	1	2	14	4	5	2
1	2	2	2	2		2		3	2	6	1	2	4	1	1	2	9	3	7	7
1	4	1	1	2		2		1	2	2	2	2	5	1	1	2	13	4	2	5
2	2	2	6	-96		-96		1	1	1	2	2	5	3	2	2	6	4	4	5
2	2	4	3	46		5	Conservative party	3	2	6	2	2	4	1	1	2	13	4	4	2
1	4	4	3	2		2		1	1	1	5	2	6	1	1	2	4	4	1	7
1	3	2	2	2		2		4	1	7	3	2	4	1	1	2	5	4	1	7
3	2	4	4	1		3		5	1	9	3	1	6	1	1	2	9	4	2	5
1	4	2	1	4		4		1	1	1	5	2	3	1	1	1	5	4	8	4
2	4	2	2	4		4		2	1	3	5	1	4	3	1	2	2	4	4	4
2	3	2	5	2		2		8	1	15	5	2	2	1	1	2	5	4	1	3
2	4	2	2	-96		-96		3	1	5	3	2	3	2	2	1	10	4	4	3
4	4	4	3	2		2		3	2	6	3	2	3	1	1	2	3	4	4	5
2	3	4	3	51		51		3	1	5	5	1	5	1	1	2	8	4	3	7
1	4	1	1	97		24		4	1	7	4	1	6	1	1	2	8	4	2	7
4	4	1	6	-96		-96		2	2	4	5	2	4	3	2	2	14	4	4	1
2	3	4	5	2		2		4	1	7	4	2	2	1	1	2	5	4	2	3
2	2	3	2	-96		-96		5	1	9	5	2	2	2	2	1	8	4	2	3
1	4	2	1	4		4		3	1	5	5	2	2	1	1	2	6	4	9	6
1	3	2	3	1		51		3	1	5	3	1	5	3	1	2	9	4	4	7
1	4	1	2	97		97		7	1	13	5	2	3	1	1	2	-99	4	2	3
2	2	3	5	1		1		2	1	3	5	2	4	1	1	1	7	4	4	3
3	-98	2	3	-99		-99		1	2	2	2	2	4	1	1	2	-99	4	2	4
1	3	2	5	1		1		1	2	2	2	2	2	1	1	2	5	4	9	3
1	4	2	1	2		2		2	1	3	4	2	3	1	1	2	12	4	3	1
4	1	4	2	1		1		8	1	15	5	2	4	1	1	2	1	4	2	2
1	4	2	5	5	Coalition	5	Coalition	5	1	9	1	1	6	1	1	2	10	4	1	5
2	3	4	-98	1		1		3	1	5	1	2	6	2	1	2	-98	4	10	7
3	4	4	5	2		2		5	1	9	5	1	1	1	1	2	13	4	3	6
2	3	2	2	2		2		3	1	5	5	2	6	1	1	2	8	4	2	2
1	2	1	6					2	1	3	5	2	5	1	1	2	8	4	1	2
1	4	2	1	2		2		1	2	2	1	1	4	1	1	2	6	4	10	6
1	3	2	2	4		4		2	1	3	4	1	4	3	1	2	4	4	4	3
1	4	2	2	1		1		4	1	7	2	1	4	1	1	2	4	4	5	3
1	3	2	3	2		2		1	1	1	4	1	5	2	1	1	5	4	2	3
2	4	4	2	2		2		1	1	1	4	1	2	2	2	1	5	4	1	1
1	4	4	2	1		1		5	1	9	5	1	4	2	1	1	10	4	5	3
1	4	2	2	2		2		1	2	2	4	2	5	1	1	2	7	4	3	1
1	5	2	5	4		4		2	1	3	4	2	2	1	1	2	7	4	9	6
2	5	2	2	4		4		3	1	5	3	2	2	1	1	2	12	4	10	7
2	2	2	5	1		1		2	1	3	4	2	6	1	1	2	10	4	2	7
3	5	4	3	1		1		2	1	3	4	1	5	2	1	2	7	4	2	5
1	3	2	5	1		1		4	1	7	5	1	3	2	2	1	2	4	4	1
1	3	2	2	1		1		4	1	7	4	1	6	3	2	2	13	4	1	3
1	3	1	2	3		6		1	2	2	4	1	5	1	1	2	6	4	2	3
2	2	4	2	16		16		2	1	3	4	1	4	1	1	2	3	4	4	3
2	5	2	3	1		1		1	1	1	3	1	2	2	1	1	4	4	9	4
3	3	4	5	-97		1		1	1	1	2	1	5	1	1	2	7	4	3	2
4	3	2	2	2		2		2	2	4	2	2	6	2	1	2	4	4	2	1
3	5	4	5	1		1		1	2	2	4	1	4	1	1	2	2	1	2	2
2	3	4	5	1		1		3	1	5	2	2	2	1	1	2	6	4	10	5
2	2	2	2	1		3		5	1	9	4	2	4	1	1	2	10	4	7	5
2	3	2	2	4		2		5	1	9	4	2	3	1	1	2	5	4	4	1
1	4	1	1	4		2		2	1	3	2	2	3	1	1	2	4	4	2	4
2	4	2	3	13		1		3	2	6	3	1	3	1	1	2	10	4	4	5
1	5	2	2	2		2		3	2	6	3	1	5	1	1	2	4	4	2	3
1	2	3	2	2		2		3	1	5	3	2	5	1	1	2	8	4	1	3
1	3	2	2	97		97		8	1	15	4	2	3	1	1	2	2	4	2	3
2	3	2	5	1		1		1	2	2	3	1	6	1	1	2	9	4	2	4
1	3	2	2	2		2		6	2	12	3	2	7	1	1	2	10	4	2	4
1	3	2	5	-99		-99		6	2	12	1	2	4	1	1	2	4	4	3	6
1	4	1	2	1		1		2	2	4	4	2	5	1	1	2	14	4	10	6
1	4	1	1	4		4		1	2	2	3	1	6	1	1	2	6	4	2	3
1	4	2	2	2		2		2	1	3	3	2	7	1	1	2	-99	4	1	3
2	4	2	6	-96		-96		2	1	3	5	2	4	2	2	1	2	4	4	1
1	3	1	4	2		2		2	1	3	5	2	5	1	1	2	2	4	1	3
4	3	4	4	46		46		5	1	9	5	2	4	2	1	2	1	4	2	1
3	4	2	4	3		3		2	2	4	1	2	5	1	1	2	10	4	1	5
3	1	2	3	1		1		4	1	7	3	1	3	1	1	2	5	4	4	5
2	3	2	2	1		1		1	1	1	5	1	2	1	1	2	1	4	9	3
1	4	2	2	-98		-98		2	2	4	4	2	5	1	1	2	10	4	3	5
1	4	2	2	32		32		5	1	9	5	2	4	1	1	2	12	4	6	2
2	4	2	5	1		1		5	1	9	2	2	6	1	1	2	14	4	2	6
1	4	1	2	2		2		5	1	9	5	2	5	1	1	2	14	4	5	6
3	2	4	5	51		1		3	2	6	3	1	4	1	1	2	2	4	4	4
1	4	4	1	2		2		8	1	15	5	2	5	1	1	2	10	4	1	-97
1	3	2	2	2		4		2	1	3	3	1	3	1	1	2	4	4	4	3
1	4	4	5	4		4		3	2	6	2	2	3	1	1	2	9	1	7	6
1	3	2	5	2		4		3	2	6	4	1	5	1	1	2	1	4	2	1
2	2	2	4	2		2		4	1	7	1	1	5	1	1	2	5	4	2	-97
1	3	2	2	2		2		3	2	6	1	1	6	1	1	2	7	4	2	7
3	3	2	4	1		1		2	2	4	4	1	6	1	1	2	6	4	3	9
2	2	2	5	1		1		6	2	12	1	2	4	1	1	2	10	4	1	4
3	2	2	4	3		3		2	2	4	2	1	3	1	1	2	4	4	3	5
3	2	4	5	51		51		3	1	5	5	2	7	1	1	2	14	4	2	9
3	5	4	4	5	Majors last	13		1	2	2	5	1	5	1	1	2	1	4	2	3
2	2	2	5	51		11		3	2	6	1	2	5	1	1	2	7	4	6	4
1	3	2	1	2		2		2	1	3	5	2	5	1	1	2	6	4	1	-97
1	3	2	2	2		2		2	1	3	5	2	2	1	1	1	5	4	3	3
2	3	2	3	3		1		1	2	2	3	2	7	1	1	2	10	4	2	4
1	4	1	2	4		58		3	2	6	3	2	2	1	1	2	3	4	1	3
4	4	1	1	2		2		5	1	9	4	1	3	1	1	2	2	4	4	1
3	5	4	5	15		15		5	1	9	5	1	5	2	1	2	12	4	1	3
3	2	2	4	1		1		6	1	11	4	1	6	1	1	2	3	4	2	1
1	4	1	1	2		4		2	1	3	4	2	5	1	1	2	8	4	2	3
1	3	1	1	2		2		2	2	4	1	1	6	1	1	2	1	4	2	4
1	4	1	1	2		2		8	1	15	5	1	5	1	1	2	13	4	1	1
1	5	2	2	-99		-99		4	2	8	4	1	4	1	1	2	1	4	4	7
4	1	4	4	8		1		1	2	2	4	1	5	1	1	1	5	4	2	2
1	4	2	2	2		2		1	1	1	5	2	6	1	1	2	3	4	6	5
-98	-98	2	2	-99		-99		2	2	4	1	2	4	1	1	2	9	4	7	7
1	5	2	2	1		1		1	1	1	5	1	5	1	1	2	1	4	2	4
2	2	3	3	1		1		2	2	4	5	2	2	1	1	2	6	4	10	3
2	3	4	5	1		1		3	2	6	4	1	2	1	1	2	10	4	10	7
2	5	4	2	-99		-99		1	1	1	5	2	6	1	1	2	4	4	10	1
1	3	2	3	1		1		5	2	10	3	2	4	1	1	2	13	4	4	6
4	4	2	1	4		4		3	1	5	3	2	4	3	1	1	3	4	3	1
4	5	4	4	8		13		1	1	1	5	1	2	1	1	2	4	4	2	4
3	3	4	5	1		1		2	1	3	5	2	3	1	1	2	3	4	4	1
2	3	2	3	1		97		2	1	3	5	2	5	1	1	2	4	1	2	2
1	4	2	2	1		97		2	2	4	5	2	3	1	1	2	3	4	4	2
2	5	4	5	1		1		1	2	2	1	1	5	1	1	2	6	4	4	5
1	4	1	2	2		4		4	1	7	2	2	5	1	1	2	8	4	2	1
1	4	4	1	2		2		5	1	9	3	2	5	3	1	2	8	4	1	5
4	5	4	4	51		51		3	2	6	4	1	4	1	1	2	8	4	10	4
1	4	1	6	-96		-96		2	2	4	2	1	3	3	2	2	3	4	4	1
2	4	2	5	4		4		3	2	6	4	2	6	1	1	2	13	4	1	4
1	3	1	1	2		2		1	2	2	1	1	5	1	1	2	10	4	2	4
4	2	4	4	1		1		3	1	5	5	1	6	1	1	2	13	4	1	6
3	5	4	5	1		1		1	2	2	2	1	6	1	1	2	9	4	2	5
2	2	4	4	51		51		3	2	6	2	1	7	3	1	2	11	4	2	3
2	2	2	5	1		1		4	2	8	3	2	6	1	1	2	11	4	2	7
2	5	2	3	1		1		4	1	7	5	1	3	1	1	2	14	4	2	1
1	4	2	6	-97		-97		4	2	8	1	1	6	3	2	2	4	4	2	5
1	3	1	2	2		2		1	1	1	5	1	7	1	1	2	-99	4	2	3
2	5	2	2	51		6		3	1	5	1	1	6	1	1	2	8	4	4	3
1	4	2	2	1		1		4	2	8	2	2	6	1	1	2	11	4	2	7
2	5	2	3	2		2		5	1	9	3	1	4	1	1	2	9	4	4	6
3	5	2	3	2		2		5	1	9	4	2	7	3	2	2	11	4	2	2
2	4	2	3	3		3		1	2	2	3	2	4	1	1	2	6	4	2	3
1	4	2	2	4		4		2	2	4	5	2	7	1	1	2	10	1	2	-97
1	3	2	2	4		4		2	2	4	1	1	1	1	1	2	13	4	7	6
4	1	4	4	51		1		3	1	5	5	1	5	2	1	1	1	4	4	1
2	4	1	2	2		2		3	1	5	5	1	3	1	1	2	14	4	7	7
1	-98	-98	3	1		1		4	1	7	1	2	5	2	1	2	9	4	9	9
1	3	2	2	2		2		2	2	4	2	1	3	2	1	1	2	4	2	1
1	4	1	2	2		2		2	1	3	4	2	7	1	1	2	10	4	1	6
2	3	2	3	2		2		2	2	4	5	2	3	1	1	2	10	4	4	4
1	3	2	1	2		2		2	1	3	5	1	7	1	1	2	8	4	2	2
2	4	2	3	1		-98		2	1	3	4	2	3	1	1	2	5	4	4	6
1	3	2	2	4		1		2	1	3	5	1	6	1	1	2	10	4	3	5
2	4	2	3	2		2		1	1	1	5	2	3	1	1	2	9	4	4	2
1	4	1	2	4		4		4	1	7	1	2	4	1	1	2	4	4	6	3
1	4	3	2	2		2		8	1	15	5	2	6	2	1	1	11	4	2	2
1	3	2	2	4		4		5	2	10	2	2	5	1	1	2	14	4	3	-97
2	3	2	2	1		2		5	1	9	4	1	5	1	1	2	2	4	3	3
1	4	4	2	51		51		3	2	6	2	2	5	1	1	2	10	4	1	7
2	3	2	4	3		3		2	2	4	2	2	7	1	1	2	8	4	9	2
3	5	4	3	1		1		4	1	7	5	1	2	1	1	2	1	4	2	4
2	2	2	5	1		1		2	1	3	4	2	6	1	1	2	5	4	7	7
2	3	4	2	1		1		1	2	2	2	2	5	2	1	1	5	4	2	1
2	4	2	3	3		1		2	2	4	1	1	2	1	1	2	7	4	1	3
2	2	4	5	1		1		4	1	7	4	1	3	1	1	1	-98	4	4	5
1	3	2	5	-96		-96		3	1	5	5	2	3	1	1	2	2	4	7	3
2	5	2	3	2		2		3	1	5	5	1	4	1	1	1	3	4	7	4
2	2	2	2	51		51		3	1	5	5	1	5	1	1	2	4	4	2	1
2	4	4	3	1		1		5	1	9	4	2	3	1	1	2	8	4	4	4
1	4	2	5	1		1		5	1	9	2	1	3	1	1	2	4	4	4	4
1	4	2	2	4		4		2	2	4	2	1	4	1	1	2	6	4	1	5
1	2	2	3	97		1		3	1	5	5	1	6	2	1	1	8	4	1	2
1	3	2	3	1		1		3	2	6	4	2	4	1	1	2	4	4	1	5
4	4	2	4	1		1		3	1	5	5	2	4	2	1	2	2	4	4	3
4	2	4	2	1		38		4	1	7	5	1	3	1	1	2	2	4	4	3
1	4	2	2	4		4		6	1	11	4	2	4	1	1	2	5	4	5	2
2	4	2	5	3		3		2	2	4	1	2	6	1	1	2	4	4	2	2
1	2	2	2	3		3		2	2	4	1	2	6	1	1	2	9	4	2	7
2	2	4	2	1		1		2	2	4	1	2	6	1	1	2	4	4	2	6
1	4	4	5	2		2		3	1	5	1	2	4	1	1	2	7	4	4	5
1	4	2	2	2		2		2	1	3	5	2	6	1	1	2	6	4	2	3
2	3	2	4	1		1		3	2	6	4	1	6	1	1	2	8	4	3	4
1	4	2	1	1		1		1	2	2	2	2	5	1	1	2	13	4	2	9
1	4	1	1	2		2		2	1	3	5	1	2	2	1	1	2	4	2	1
1	3	2	2	4		4		8	1	15	4	1	3	1	1	2	5	4	2	1
1	4	2	1	2		2		4	1	7	1	2	6	2	1	2	10	4	1	2
1	4	1	1	2		2		7	1	13	5	1	5	1	1	2	1	4	2	2
2	3	2	2	16		-98		3	2	6	2	2	5	1	1	2	12	4	1	-97
4	4	2	2	2		2		3	1	5	5	2	5	1	1	2	7	4	1	3
1	4	2	2	1		1		2	1	3	4	2	3	1	1	2	6	4	4	1
2	2	4	3	6		-98		5	1	9	3	1	3	3	1	2	14	4	8	4
4	5	4	4	1		1		1	1	1	2	2	5	1	1	2	8	4	2	3
1	3	1	1	4		4		1	1	1	5	1	4	1	1	2	1	4	4	1
3	2	4	5	1		1		3	1	5	3	2	6	1	1	2	12	4	2	9
1	3	1	2	4		4		5	1	9	5	2	4	1	1	2	5	4	4	3
2	4	4	2	2		2		4	1	7	2	1	5	1	1	2	6	4	3	5
1	4	2	2	2		2		8	1	15	5	2	3	1	1	2	6	4	4	3
1	4	2	6	-97		-97		1	1	1	5	1	5	1	1	2	12	4	2	7
4	2	4	5	15		15		3	2	6	4	1	4	2	1	1	1	4	2	3
1	4	2	2	2		2		2	1	3	3	2	3	2	1	1	5	4	4	3
1	4	2	1	2		2		1	1	1	3	1	2	1	1	2	6	4	2	6
2	2	2	2	2		2		4	1	7	2	2	4	1	1	2	10	4	6	7
4	5	4	4	5	Conservative Alliance	5	Conservative alliance	6	1	11	3	2	4	1	1	2	4	4	5	2
2	2	2	3	1		1		1	1	1	5	1	-97	1	1	2	2	4	6	1
1	4	4	5	2		2		1	2	2	1	2	5	1	1	2	9	4	10	7
1	3	2	2	2		4		2	1	3	5	1	2	2	1	2	14	4	5	3
2	5	4	5	2		2		2	1	3	2	1	2	1	1	2	14	4	7	5
2	3	2	3	1		1		5	1	9	5	1	7	1	1	2	2	4	2	5
3	5	4	4	46		38		3	1	5	3	1	4	1	1	2	4	4	1	3
2	-98	-98	3	2		-98		3	1	5	1	2	6	1	1	2	11	1	4	7
1	4	1	1	4		4		3	1	5	3	2	5	1	1	2	12	4	5	1
1	4	2	1	2		2		2	1	3	5	2	5	1	1	2	6	4	3	1
1	3	2	2	58		58		1	2	2	1	2	4	1	1	2	7	4	6	7
1	4	4	2	2		2		2	1	3	3	2	5	1	1	2	9	4	1	4
1	4	1	1	4		47		5	1	9	5	1	5	1	1	2	11	4	9	5
2	3	3	5	-96		-96		2	1	3	5	2	3	2	2	1	6	4	1	1
1	4	1	1	4		4		3	1	5	4	2	2	3	1	2	9	4	2	3
1	3	1	2	24		1		4	1	7	3	1	6	1	1	2	9	4	2	1
2	5	2	2	38		38		4	1	7	4	1	6	1	1	2	8	4	9	7
1	4	2	2	2		2		3	1	5	2	1	4	1	1	2	1	4	2	1
2	2	4	3	-99		-99		3	2	6	1	1	7	1	1	2	10	4	1	-97
1	4	1	2	4		4		4	1	7	1	2	5	3	1	2	8	4	3	4
1	3	2	6	-96		-96		2	1	3	4	1	6	3	2	2	10	4	2	2
2	4	2	2	2		2		1	2	2	2	1	5	1	1	2	10	4	2	2
3	5	2	5	1		5	Conservatives	4	1	7	4	2	6	1	1	2	3	4	3	1
1	3	2	1	2		23		2	2	4	3	2	3	2	1	1	5	4	4	3
1	2	2	5	2		2		1	2	2	3	1	1	1	1	2	12	4	9	5
3	2	4	4	1		1		2	1	3	5	1	6	1	1	2	4	4	3	2
2	-98	2	2	1		1		2	1	3	5	1	1	3	1	2	13	4	4	6
2	4	2	4	1		1		5	1	9	5	2	2	1	1	2	12	4	9	3
2	4	2	2	1		-98		3	1	5	5	1	3	1	1	2	3	4	10	6
2	5	2	5	2		2		1	1	1	2	1	5	1	1	2	5	4	2	5
1	2	2	2	2		2		1	2	2	1	2	5	1	1	2	5	4	2	5
1	4	2	2	1		1		5	1	9	4	2	3	1	1	1	4	4	4	1
1	5	2	3	4		4		2	1	3	5	1	2	2	2	1	10	4	2	6
2	2	2	2	1		1		1	1	1	5	2	2	1	1	2	6	4	10	6
3	1	-98	4	-99		-99		3	1	5	3	2	2	1	1	2	-98	4	4	4
2	3	3	5	2		2		1	1	1	1	1	5	1	1	2	6	4	9	1
2	4	2	5	51		51		3	2	6	2	2	5	2	1	1	7	4	1	3
2	3	2	3	1		1		1	1	1	5	2	6	3	2	2	-99	4	2	5
1	3	1	2	2		4		4	1	7	4	2	6	3	1	1	6	4	10	1
2	2	3	3	1		2		3	1	5	5	2	3	1	1	1	7	4	7	4
1	2	2	3	1		-99		4	1	7	3	1	5	1	1	2	13	4	3	3
2	5	2	3	2		2		5	1	9	4	1	3	1	1	2	2	4	4	3
1	4	2	5	1		1		2	1	3	5	1	6	3	1	2	2	4	1	3
1	4	1	2	2		2		1	1	1	5	1	5	2	1	2	8	4	4	1
3	2	-99	4	-99		-99		2	1	3	2	2	5	1	1	2	14	4	6	6
1	3	2	2	2		2		2	1	3	4	2	4	1	1	2	8	4	4	1
1	2	2	2	1		4		2	1	3	5	2	4	1	1	2	4	4	4	1
1	3	2	3	2		1		1	1	1	3	1	7	1	1	2	7	4	2	4
1	4	2	2	2		2		2	1	3	4	1	6	1	1	2	10	4	1	3
1	3	2	2	1		1		2	1	3	4	2	4	2	1	1	6	4	4	2
1	3	2	5	2		2		2	2	4	3	1	5	3	1	2	13	4	2	3
2	4	3	5	1		1		1	1	1	1	1	4	2	1	1	5	4	4	3
1	3	2	3	4		4		2	1	3	5	2	2	1	1	1	2	4	3	6
2	2	4	4	1		1		1	1	1	4	2	3	3	1	2	9	4	3	3
1	4	1	1	2		2		8	1	15	5	1	6	3	1	2	5	4	2	4
2	3	2	5	1		1		1	2	2	3	1	4	1	1	2	1	4	5	9
2	4	1	2	-99		-99		1	-97	-97	-97	1	2	1	1	2	10	4	9	1
1	4	1	1	2		2		8	1	15	5	1	1	1	1	2	12	4	3	6
2	3	2	3	2		2		3	1	5	5	2	7	1	1	2	10	4	1	2
2	5	2	3	51		51		3	2	6	4	1	5	1	1	2	4	4	4	2
1	4	4	5	1		1		3	2	6	4	2	6	1	1	2	7	4	1	1
2	1	2	2	2		2		2	1	3	5	2	3	1	1	2	12	4	4	4
1	4	2	2	32		32		1	1	1	5	2	5	1	1	2	11	4	1	6
1	4	1	1	4		4		6	1	11	5	1	2	3	1	2	10	4	1	6
3	2	4	5	1		1		2	1	3	5	2	7	1	1	2	9	4	2	7
2	3	4	4	1		1		2	1	3	3	2	6	1	1	2	10	4	2	7
1	3	2	2	1		1		3	1	5	5	1	5	1	1	2	4	4	2	6
1	3	2	2	2		58		1	1	1	5	1	4	1	1	2	1	4	4	3
2	2	4	3	2		2		2	2	4	4	2	5	1	1	2	12	4	2	7
1	1	4	5	1		1		2	1	3	5	2	6	2	1	1	9	4	6	2
2	2	2	3	1		1		2	1	3	4	2	4	1	1	2	9	4	7	4
2	4	2	2	4		-97		4	1	7	3	1	5	1	1	2	7	4	4	5
1	4	2	2	2		2		4	1	7	5	1	6	3	2	2	9	4	1	3
2	3	2	1	2		2		1	1	1	5	2	4	1	1	2	2	4	4	3
2	3	2	2	1		1		1	2	2	2	1	5	1	1	2	1	4	4	3
1	4	1	1	2		2		2	1	3	5	2	6	1	1	2	9	4	2	4
1	4	1	2	2		2		3	2	6	3	1	6	2	1	2	7	4	7	6
1	3	2	2	2		2		1	1	1	5	2	3	2	1	1	13	4	4	4
1	3	2	2	2		2		1	1	1	4	2	2	2	2	2	2	4	1	1
1	4	2	2	11		11		1	1	1	1	2	4	2	1	1	8	4	5	5
2	3	3	2	2		2		4	1	7	1	2	3	1	1	2	11	4	4	7
1	5	2	2	2		2		4	1	7	3	1	1	1	1	1	8	4	9	6
2	3	2	5	2		2		2	1	3	1	2	3	1	1	2	6	4	4	5
2	4	2	2	4		4		1	1	1	5	2	3	2	1	2	1	4	10	1
1	4	4	1	2		4		6	1	11	2	1	5	1	1	2	5	4	10	1
1	4	2	2	2		2		3	1	5	5	2	6	1	1	2	10	4	2	6
1	4	3	2	4		4		3	2	6	1	2	3	1	1	2	4	4	4	6
2	2	2	4	1		1		5	1	9	3	2	7	2	1	1	3	4	2	1
1	4	2	1	4		4		3	1	5	3	2	1	3	1	2	6	4	9	5
1	5	2	2	1		1		5	1	9	4	1	6	2	1	2	2	4	2	1
1	4	2	1	4		2		2	1	3	5	2	7	1	1	2	10	4	1	3
2	3	2	2	2		2		2	1	3	3	1	5	2	1	1	7	4	1	4
3	5	4	4	1		1		4	1	7	2	1	6	3	2	2	14	4	3	7
2	3	3	3	2		2		2	1	3	5	2	2	1	1	1	8	4	4	3
2	3	4	3	2		2		4	1	7	3	2	3	1	1	2	10	4	4	6
2	2	4	5	2		2		2	1	3	3	2	6	1	1	2	10	4	2	6
2	2	4	2	1		1		1	1	1	5	1	7	1	1	2	-99	4	2	5
2	5	2	5	1		1		1	2	2	2	1	5	1	1	2	6	4	2	5
2	3	2	4	1		1		3	1	5	5	2	4	1	1	2	11	4	4	6
1	4	2	2	-97		-97		1	2	2	3	1	6	3	1	2	10	4	1	7
1	3	4	2	-96		-96		3	1	5	2	1	4	3	2	2	10	4	1	5
1	4	1	1	2		2		3	2	6	3	1	2	1	1	2	10	4	1	6
4	4	2	2	2		2		2	1	3	4	1	3	2	1	1	2	4	4	3
3	2	4	3	51		51		3	2	6	1	1	5	1	1	2	6	4	2	7
2	2	2	4	1		1		4	1	7	3	2	6	1	1	2	10	4	2	6
1	4	2	2	4		4		3	2	6	3	1	4	3	1	2	2	4	2	6
1	4	4	2	-97		-97		2	1	3	3	1	3	2	1	1	2	4	1	1
3	3	4	5	5	Conservatives	5	Conservatives	1	2	2	3	2	5	1	1	2	4	4	3	2
1	4	1	1	4		4		1	1	1	5	1	3	1	1	2	1	4	4	2
3	2	4	5	51		51		3	1	5	5	1	5	1	1	2	1	4	2	1
2	4	4	2	11		11		3	1	5	2	1	4	1	1	2	6	4	2	7
2	3	2	2	1		1		6	2	12	4	1	5	1	1	2	7	1	2	6
2	5	1	1	2		2		6	2	12	2	2	2	1	1	2	14	4	10	1
2	4	2	2	-96		-96		2	1	3	2	2	3	2	2	2	3	4	2	1
2	2	3	3	1		1		3	1	5	5	1	7	1	1	2	8	4	2	2
1	4	2	2	-99		-99		1	1	1	5	2	4	1	1	2	7	4	1	3
2	3	2	6	-96		-96		4	1	7	3	1	2	2	2	1	10	4	2	1
2	2	2	2	1		1		1	1	1	5	1	7	1	1	2	4	4	2	1
4	1	4	4	11		11		1	2	2	4	1	5	1	1	2	10	4	2	4
1	4	3	6					5	1	9	2	1	5	1	1	2	8	4	1	9
2	2	4	3	1		3		1	2	2	3	2	4	1	1	2	7	4	1	7
1	4	2	2	4		4		1	1	1	5	2	2	1	1	2	5	4	3	6
4	2	4	5	11		1		1	1	1	4	1	6	1	1	2	3	4	3	4
1	4	1	1	-97		-97		3	2	6	4	1	1	1	1	2	9	4	10	6
1	-98	4	1	2		2		2	1	3	2	2	5	2	1	1	12	4	4	4
1	3	3	4	2		2		8	1	15	4	2	3	1	1	2	9	4	7	4
1	4	2	2	1		1		1	1	1	4	1	3	3	1	2	2	4	1	6
1	3	1	2	2		2		1	1	1	3	2	4	3	1	1	5	4	3	1
2	2	2	5	1		1		1	2	2	2	1	5	1	1	2	2	4	3	9
1	4	2	2	2		2		2	2	4	4	1	1	1	1	2	11	4	5	6
3	4	4	5	-97		28		1	1	1	1	1	3	1	1	1	7	4	5	6
1	2	2	5	2		2		3	1	5	2	2	6	1	1	2	10	4	1	7
2	2	2	3	1		65		5	1	9	5	2	7	1	1	2	8	4	2	2
1	3	2	2	2		2		1	1	1	3	2	2	1	1	2	5	4	4	5
1	4	2	5	4		4		2	1	3	5	2	3	3	1	2	2	4	4	3
1	4	2	2	1		1		1	1	1	3	1	3	1	1	2	4	4	4	3
1	4	4	2	-99		-99		2	1	3	5	2	3	1	1	2	14	4	1	4
1	4	-98	2	4		4		1	2	2	2	2	5	1	1	2	8	4	2	5
1	2	2	2	1		-99		1	1	1	3	2	3	2	1	1	14	4	4	3
2	3	4	5	1		1		2	1	3	4	2	6	1	1	2	15	4	2	7
2	3	2	6	-97		-97		5	1	9	5	1	3	3	2	2	2	4	4	1
2	2	2	5	2		2		1	1	1	5	1	6	1	1	2	10	1	10	9
1	4	2	2	32		32		4	1	7	2	2	3	1	1	2	-99	4	4	7
1	4	2	5	51		51		3	1	5	4	2	7	3	1	2	10	4	1	6
3	5	2	5	1		1		1	1	1	5	1	4	1	1	1	1	4	4	5
1	4	1	6	-97		-97		5	1	9	4	1	4	1	1	2	2	4	4	7
2	2	2	2	1		1		5	1	9	3	1	5	3	1	2	1	4	4	4
1	3	2	2	2		2		2	2	4	3	1	5	1	1	2	1	4	3	4
3	2	2	4	2		2		4	1	7	2	2	5	3	1	2	9	4	3	2
1	4	2	1	2		2		4	1	7	2	2	6	1	1	2	10	4	2	9
1	3	2	6					1	1	1	2	1	6	3	2	2	1	4	3	5
2	4	2	2	2		2		2	1	3	5	2	2	2	2	1	4	4	4	3
2	3	3	3	1		1		1	1	1	3	2	4	1	1	2	9	4	4	3
2	5	2	4	1		1		4	1	7	4	1	6	2	1	1	8	4	2	5
1	4	1	1	2		2		2	2	4	5	2	2	3	1	2	11	4	3	1
2	3	2	3	51		51		3	1	5	1	2	3	1	1	2	13	4	5	3
2	2	4	5	4		4		1	1	1	2	1	4	1	1	2	9	4	6	5
2	3	2	2	13		1		6	2	12	2	2	6	1	1	2	15	4	2	7
1	5	1	2	2		2		1	1	1	5	1	6	3	1	2	7	4	2	1
3	5	2	5	1		1		1	1	1	4	1	4	1	1	2	4	1	5	7
1	4	2	2	2		1		1	2	2	2	1	6	1	1	2	6	4	5	3
2	4	2	5	97		97		8	1	15	5	2	3	1	1	2	3	4	4	1
1	4	1	1	4		4		1	2	2	2	1	5	1	1	2	4	4	2	1
1	4	2	1	2		4		2	2	4	2	2	6	1	1	2	9	4	2	7
2	2	2	5	1		1		5	1	9	5	2	5	1	1	2	6	4	2	6
1	3	2	2	2		4		6	1	11	3	2	4	1	1	2	2	1	4	3
1	3	2	2	2		2		2	2	4	3	1	5	1	1	2	1	4	3	2
1	4	1	1	2		23		2	2	4	2	2	3	1	1	2	7	4	4	6
4	4	2	1	2		2		6	2	12	2	1	3	1	1	2	5	4	4	1
1	3	4	2	-99		-99		2	1	3	4	2	3	1	1	2	14	4	4	6
2	3	2	2	1		22		6	2	12	2	2	3	1	1	2	11	4	4	5
1	4	2	2	2		2		2	1	3	3	2	2	1	1	2	8	4	4	3
1	4	1	2	4		4		2	1	3	4	2	3	1	1	2	8	4	10	2
2	2	4	2	1		1		1	1	1	5	2	5	1	1	2	6	4	3	5
1	2	2	2	1		2		1	1	1	3	1	5	1	1	2	2	4	2	3
1	4	1	1	2		2		1	1	1	5	1	6	1	1	2	2	4	2	2
1	3	4	2	4		4		3	2	6	3	2	3	1	1	2	5	4	7	4
2	3	4	4	1		1		6	2	12	1	1	7	1	1	2	10	4	2	5
4	5	4	4	1		1		2	2	4	2	1	4	1	1	2	4	4	9	4
2	2	2	2	1		1		2	1	3	2	2	5	2	1	2	1	4	1	1
1	4	2	1	2		2		2	1	3	4	1	6	1	1	2	7	4	3	3
1	4	1	2	2		56		1	2	2	3	1	5	1	1	2	10	4	1	2
1	3	2	2	2		2		8	1	15	5	2	3	1	1	2	2	4	2	3
1	4	2	2	4		4		3	2	6	1	2	3	1	1	2	10	4	4	6
1	4	2	2	2		2		2	1	3	5	2	7	1	1	2	4	4	2	2
1	3	2	2	1		1		3	2	6	4	1	4	1	1	2	6	4	2	3
2	3	2	3	51		51		3	1	5	5	2	5	1	1	2	6	4	4	3
1	3	4	6	-96		-96		3	1	5	3	2	7	3	2	2	15	4	2	7
2	2	4	3	1		1		2	1	3	4	2	2	1	1	2	13	4	4	3
1	4	2	2	4		2		3	1	5	4	2	3	1	1	2	8	4	4	3
3	2	4	5	51		51		3	1	5	3	1	5	1	1	2	1	4	2	6
2	4	1	2	2		2		3	1	5	5	1	5	3	1	2	1	4	4	1
1	4	1	2	1		1		5	1	9	5	2	5	1	1	2	2	4	2	2
2	3	2	2	2		2		3	2	6	2	1	5	1	1	2	4	4	3	5
1	4	2	2	2		2		2	1	3	5	1	6	3	1	2	5	4	2	4
1	4	1	5	2		-97		4	1	7	4	1	7	3	1	2	8	4	2	-97
1	4	2	2	4		4		4	1	7	4	1	5	3	1	2	2	4	3	2
1	4	2	2	2		2		4	1	7	2	2	4	1	1	2	5	4	1	6
2	5	2	5	1		3		5	2	10	2	1	6	3	1	2	10	4	3	2
2	3	2	3	1		1		5	1	9	5	1	5	1	1	2	14	4	2	4
1	4	2	2	2		2		5	1	9	5	1	6	3	1	2	5	4	2	4
3	2	4	3	1		1		5	1	9	3	1	6	1	1	2	13	4	2	9
3	2	4	3	1		1		5	1	9	3	1	5	1	1	2	15	4	1	7
4	4	2	2	4		4		5	1	9	2	2	5	1	1	2	12	4	2	4
2	3	2	5	5	Some party	5	Some party	2	2	4	2	2	5	1	1	2	4	4	1	3
2	3	2	2	1		1		5	1	9	4	2	4	1	1	2	7	4	4	5
2	2	2	5	1		1		2	1	3	3	2	7	1	1	2	7	4	2	6
1	4	2	2	2		2		3	1	5	1	1	4	1	1	2	3	4	4	3
2	3	2	5	64		64		2	1	3	1	1	2	1	1	2	13	4	5	6
1	4	1	1	2		4		1	2	2	4	1	6	1	1	2	5	4	2	2
1	3	1	2	3		3		1	2	2	2	1	5	1	1	2	5	4	2	3
4	2	4	4	3		3		2	2	4	4	1	6	1	1	2	6	4	2	7
2	3	2	6	-96		-96		1	1	1	5	2	3	3	2	2	1	4	4	1
1	3	2	2	2		32		3	2	6	3	2	6	1	1	2	9	4	2	5
3	1	4	4	1		1		3	2	6	4	1	6	1	1	2	15	4	2	5
1	3	3	2	2		2		1	2	2	3	2	2	1	1	1	12	4	10	4
1	4	1	2	2		2		8	1	15	5	2	6	1	1	2	5	4	9	3
3	5	4	5	1		1		2	1	3	5	1	3	1	1	1	5	4	4	5
2	2	2	5	3		3		2	2	4	1	1	7	1	1	2	9	4	1	9
1	4	3	2	63		4		2	1	3	2	1	3	1	1	2	5	4	2	2
4	3	2	5	1		1		2	1	3	5	1	5	1	1	2	2	4	4	5
2	2	2	5	1		1		2	1	3	4	2	5	1	1	2	15	4	1	3
4	2	4	3	1		1		2	1	3	4	2	7	1	1	2	9	4	1	5
2	4	1	2	1		1		2	1	3	3	1	4	1	1	2	2	4	10	2
4	1	4	4	3		3		6	1	11	2	1	5	1	1	2	5	4	2	7
2	2	2	3	-98		-98		1	1	1	5	2	1	1	1	2	7	4	9	3
1	3	2	2	4		4		1	1	1	5	1	2	1	1	2	2	4	2	3
2	3	2	3	51		51		3	2	6	1	1	4	1	1	2	6	4	6	7
1	3	3	1	1		1		5	1	9	3	2	7	1	1	2	10	4	1	9
1	3	2	6	-96		-96		3	1	5	5	2	5	2	2	1	3	4	1	1
3	3	2	5	51		1		3	2	6	2	1	6	1	1	2	3	4	2	3
2	2	3	5	1		1		5	1	9	5	2	6	1	1	2	11	4	2	7
1	3	2	5	1		1		4	2	8	2	2	2	1	1	2	11	4	4	4
2	3	2	3	51		51		3	2	6	3	2	4	1	1	2	4	4	4	3
1	2	2	2	51		51		3	1	5	5	2	3	1	1	1	1	4	4	1
1	5	2	2	1		8		1	2	2	1	2	5	1	1	2	14	4	2	3
3	5	4	5	15		1		5	1	9	1	1	6	3	1	2	14	4	2	4
4	5	4	4	1		1		5	1	9	5	1	6	3	1	2	5	4	2	2
3	5	2	3	1		1		2	1	3	5	1	3	1	1	2	3	4	1	1
1	2	3	2	1		1		3	1	5	5	2	7	1	1	2	11	4	2	7
2	3	2	5	1		1		3	1	5	3	2	6	3	1	2	4	4	2	1
1	4	1	1	2		4		2	1	3	4	1	6	2	1	1	-99	4	4	1
2	2	3	2	2		2		2	1	3	3	2	4	1	1	2	6	4	1	4
3	5	4	5	-96		-96		2	1	3	4	1	3	3	2	2	2	4	4	3
2	3	2	3	1		45		2	1	3	4	1	5	1	1	2	2	4	4	1
4	2	4	5	1		1		1	1	1	5	1	7	1	1	2	1	4	2	3
1	4	3	4	2		2		2	1	3	5	1	1	1	1	2	7	4	2	6
2	4	2	2	2		2		2	1	3	1	1	4	2	1	1	8	4	4	5
1	4	2	2	4		4		3	1	5	4	2	2	1	1	2	7	4	2	3
2	2	4	4	1		1		3	2	6	2	1	5	3	1	2	4	4	1	4
3	5	4	4	1		1		1	1	1	5	1	4	1	1	2	3	4	4	6
2	2	2	2	1		1		1	2	2	2	2	3	1	1	2	4	4	4	3
3	2	4	4	1		1		2	2	4	2	1	5	1	1	2	2	4	1	3
2	3	4	5	1		2		2	1	3	3	2	4	2	1	1	10	4	7	3
2	3	4	3	1		97		6	2	12	1	1	6	1	1	2	6	4	2	4
2	5	2	3	3		3		3	1	5	5	1	4	1	1	2	2	4	5	3
1	4	1	1	4		4		2	1	3	1	2	2	1	1	2	4	4	2	1
4	2	4	4	1		1		8	1	15	4	1	4	1	1	2	6	4	2	6
2	2	2	4	1		1		1	1	1	4	2	4	2	1	2	1	4	4	1
1	4	2	2	2		2		2	2	4	2	1	5	2	1	2	5	4	4	5
4	4	4	3	1		1		2	1	3	4	2	3	1	1	2	5	4	4	1
2	5	4	4	51		51		3	2	6	4	1	4	1	1	2	4	4	4	5
1	4	1	1	2		4		1	2	2	3	1	6	1	1	2	2	4	2	1
1	3	1	2	4		4		2	1	3	3	1	4	1	1	1	5	4	4	3
1	4	1	2	4		4		2	1	3	3	1	2	1	1	2	1	4	2	6
1	3	2	2	2		2		2	1	3	3	2	4	1	1	2	5	4	7	2
1	4	2	1	2		2		2	1	3	5	2	6	1	1	2	10	4	3	5
2	4	2	3	2		2		5	2	10	5	1	6	1	1	2	6	4	2	6
-98	3	2	3	1		1		5	1	9	4	1	6	1	1	2	6	4	2	6
1	5	2	2	2		2		5	2	10	4	1	5	1	1	2	4	4	9	2
1	4	2	2	2		2		1	2	2	3	1	5	1	1	2	2	4	2	1
3	3	2	4	1		1		1	2	2	1	2	5	1	1	2	8	4	1	2
1	3	2	2	-99		-99		8	1	15	5	2	5	1	1	1	11	4	3	6
1	4	2	2	4		27		4	1	7	2	1	5	1	1	2	4	4	4	6
4	4	2	2	2		4		3	1	5	5	2	6	1	1	2	4	4	2	1
2	3	2	3	2		2		1	1	1	1	2	4	1	1	2	7	1	3	5
2	2	4	3	1		1		2	1	3	5	1	5	3	1	2	4	4	4	1
1	4	1	2	32		32		1	1	1	5	2	4	2	1	2	3	4	2	1
2	3	2	2	4		2		3	1	5	5	2	2	2	1	2	4	4	2	1
1	3	2	2	4		4		1	1	1	3	2	3	1	1	2	3	4	4	1
1	3	2	2	11		38		4	1	7	5	1	7	1	1	1	9	4	10	5
2	4	2	3	1		1		5	1	9	3	2	3	1	1	2	3	4	2	5
1	3	2	5	1		1		1	1	1	5	2	3	1	1	2	2	4	4	2
1	4	2	2	1		1		3	1	5	4	1	4	1	1	2	6	4	4	3
1	3	2	2	1		1		4	1	7	5	2	5	1	1	2	11	4	2	3
1	4	1	1	2		2		3	1	5	3	1	1	1	1	1	13	4	4	6
2	3	2	5	-99		-99		8	1	15	5	2	4	1	1	2	4	4	4	3
1	3	2	2	11		1		1	2	2	2	2	5	1	1	2	9	1	3	4
1	3	2	2	-96		-96		1	1	1	3	2	2	3	2	2	6	4	2	1
1	4	1	2	4		4		8	1	15	5	1	3	1	1	2	2	4	2	3
1	3	2	2	4		4		5	1	9	4	2	3	2	1	1	2	4	2	3
2	4	2	2	-97		-97		1	1	1	5	2	6	3	1	2	8	4	1	5
3	2	4	5	1		1		1	2	2	2	2	4	1	1	2	6	4	2	7
1	5	4	4	-97		-97		4	1	7	2	1	6	1	1	2	6	4	10	7
2	5	1	1	1		1		2	1	3	1	1	3	2	1	1	7	4	4	3
1	4	1	1	4		4		1	-97	-97	-97	2	3	1	1	2	-99	4	4	3
2	2	2	6	-99		-99		5	1	9	5	1	5	2	2	1	8	4	4	2
1	3	2	2	1		1		1	2	2	3	2	4	1	1	2	8	4	4	3
1	4	1	1	2		4		1	1	1	3	2	3	1	1	2	2	4	4	3
1	3	2	2	4		4		3	2	6	4	2	3	1	1	2	7	4	6	3
3	2	4	4	1		1		5	1	9	5	1	3	1	1	2	1	4	4	3
3	2	4	4	1		1		2	1	3	4	1	2	1	1	2	9	4	4	4
2	5	1	6	2		-98		4	1	7	2	1	4	3	1	2	10	4	1	-97
1	2	2	6	-99		-99		3	2	6	1	1	3	1	1	2	9	4	4	7
2	3	2	2	1		1		4	1	7	3	1	5	1	1	1	6	4	3	5
1	4	1	6	-97		-97		2	1	3	4	2	2	1	1	2	10	4	3	6
1	4	4	2	1		1		2	1	3	1	1	1	1	1	1	14	4	4	6
1	4	2	2	2		2		4	1	7	2	1	5	3	1	2	6	4	4	5
2	3	2	6	-97		-97		2	1	3	4	2	3	1	1	1	12	4	4	1
4	5	4	4	17		17		4	1	7	1	1	3	1	1	2	7	4	4	6
2	5	2	3	1		1		4	2	8	1	1	4	1	1	2	10	1	4	7
-98	-98	4	5	3		3		1	1	1	2	2	4	1	1	2	9	4	1	3
1	4	2	2	2		4		3	2	6	2	1	5	1	1	2	10	4	1	3
2	2	2	-98	-99		-99		4	1	7	5	2	5	3	2	2	6	4	3	4
1	4	2	1	2		2		1	2	2	3	1	6	3	1	2	10	4	2	3
2	4	1	2	2		2		2	1	3	5	1	2	1	1	2	3	4	3	5
2	3	2	2	1		1		4	1	7	2	2	2	1	1	2	6	4	2	3
2	1	2	2	2		2		1	2	2	2	2	2	1	1	2	4	4	4	4
3	2	4	3	1		11		1	1	1	5	1	6	1	1	2	6	4	2	4
1	4	3	2	2		2		2	1	3	4	1	2	1	1	1	4	4	10	2
1	4	2	2	-96		-96		5	1	9	2	1	2	2	2	2	8	4	3	3
1	4	2	2	2		2		3	2	6	4	1	3	1	1	2	2	4	4	3
3	3	3	3	2		2		2	1	3	3	1	5	2	1	2	11	4	2	5
1	4	2	2	2		2		4	1	7	3	2	5	1	1	2	7	4	3	5
1	2	2	3	3		3		1	2	2	2	2	7	1	1	2	10	4	3	7
3	2	2	4	1		1		2	1	3	5	2	3	2	1	1	3	4	4	3
2	5	2	4	1		1		2	1	3	4	1	5	1	1	2	1	4	1	3
1	4	2	2	2		2		2	1	3	1	2	3	1	1	2	5	4	4	6
3	2	2	3	-96		-96		3	1	5	1	1	3	2	2	1	2	4	4	1
1	3	2	6					3	1	5	5	1	3	3	2	1	1	4	4	1
2	-98	4	5	4		4		2	1	3	4	2	2	1	1	2	7	4	10	6
1	5	2	2	2		2		4	1	7	2	1	7	1	1	2	8	4	2	4
3	5	2	3	1		11		3	1	5	3	1	5	1	1	2	2	4	6	3
3	3	4	5	1		1		1	1	1	1	2	7	1	1	2	8	4	1	-97
3	5	4	5	-98		-99		1	2	2	2	2	5	1	1	2	5	4	1	3
4	5	4	4	46		46		3	1	5	3	1	3	1	1	2	2	4	1	1
2	2	2	3	1		1		3	1	5	4	2	5	1	1	2	7	4	2	4
1	3	2	3	1		1		1	2	2	5	1	7	1	1	2	7	4	2	1
4	4	2	1	2		2		5	1	9	5	1	4	1	1	2	3	4	2	3
2	3	2	3	2		2		3	2	6	5	1	5	1	1	2	11	4	10	7
3	3	2	4	1		1		1	1	1	5	2	3	1	1	2	13	4	4	4
2	2	4	5	-99		-99		8	1	15	5	2	3	-99	1	1	2	4	9	3
2	3	2	3	1		17		3	1	5	3	1	2	1	1	2	7	4	10	3
3	2	4	5	1		1		1	1	1	4	1	6	1	1	2	5	4	1	7
1	4	1	1	2		4		2	1	3	4	2	4	1	1	2	7	4	4	2
1	4	1	2	2		2		2	1	3	5	1	2	2	1	2	2	4	9	3
2	3	4	5	1		1		1	1	1	3	2	3	1	1	2	9	4	4	5
2	5	2	5	1		1		3	1	5	5	2	4	1	1	2	5	4	4	7
1	2	2	2	1		1		2	1	3	5	2	3	2	1	1	15	4	2	1
1	4	4	2	2		4		3	1	5	4	2	3	1	1	2	6	4	4	5
2	3	2	3	3		3		1	2	2	2	1	6	1	1	2	5	4	2	5
1	3	4	6					4	1	7	2	2	4	3	2	2	8	4	7	5
3	5	4	3	1		1		2	1	3	4	1	4	1	1	2	2	1	10	4
1	4	1	2	2		4		3	1	5	4	1	2	1	1	1	5	4	4	2
2	4	3	1	1		1		4	1	7	1	1	1	2	1	1	11	4	1	5
1	4	1	1	4		4		3	1	5	5	1	1	1	1	2	13	4	4	3
1	3	2	2	2		2		3	2	6	4	2	6	1	1	2	10	4	2	7
1	4	2	2	4		4		4	1	7	3	2	3	1	1	2	7	4	4	3
1	5	2	1	1		1		3	2	6	3	1	4	1	1	2	3	4	1	5
2	2	3	4	2		2		4	1	7	1	2	4	1	1	2	-99	4	4	6
3	5	2	4	1		17		4	1	7	4	2	4	3	1	2	6	4	4	1
1	4	1	2	4		4		8	1	15	5	1	3	1	1	2	7	4	1	4
1	3	2	2	2		2		1	2	2	4	2	5	1	1	2	2	4	4	2
2	3	4	4	1		1		2	1	3	5	1	1	1	1	2	10	4	3	4
1	4	2	2	2		2		8	1	15	4	2	6	1	1	2	9	4	2	3
1	2	1	2	1		1		1	1	1	1	1	2	2	2	1	4	4	4	5
1	1	2	2	2		2		3	1	5	5	2	4	1	1	2	8	4	1	6
1	4	1	2	1		1		5	1	9	5	1	2	1	1	2	4	4	2	3
1	4	1	1	4		4		1	2	2	3	1	2	1	1	2	6	4	1	1
3	1	4	3	1		1		1	1	1	4	1	6	1	1	2	10	4	4	8
1	4	2	2	4		4		3	2	6	4	1	3	1	1	2	9	4	2	3
2	3	4	6	-96		-96		2	1	3	3	2	3	3	2	2	3	4	4	6
2	2	2	6	-96		-96		2	1	3	3	2	3	2	2	1	9	4	4	1
2	2	2	5	1		1		7	1	13	4	2	6	1	1	2	10	4	2	7
2	5	2	5	2		15		1	2	2	2	1	4	3	1	2	2	4	5	5
1	2	-98	5	2		2		2	1	3	2	2	4	1	1	2	9	4	10	9
4	5	4	4	1		1		2	1	3	2	1	4	2	1	1	4	4	2	3
1	2	4	5	2		2		8	1	15	5	1	7	1	1	2	10	4	6	4
1	4	1	2	1		1		5	1	9	4	1	4	3	1	2	2	4	4	1
1	4	2	6	-96		-96		3	1	5	5	1	2	2	2	2	6	4	1	5
1	4	3	1	2		2		3	1	5	1	2	3	1	1	2	10	4	6	4
1	-98	3	2	2		2		1	1	1	2	2	5	1	1	2	11	1	1	9
1	3	2	2	4		4		3	1	5	5	1	3	1	1	2	2	4	4	1
1	3	2	3	1		1		2	1	3	5	2	2	1	1	2	6	4	2	2
2	2	4	5	1		1		3	2	6	3	2	5	1	1	2	10	4	1	5
1	4	1	6	-97		-97		1	1	1	5	2	4	3	2	2	2	4	10	3
1	4	2	2	4		4		3	1	5	3	2	3	1	1	2	8	4	4	3
1	4	2	1	2		4		1	1	1	5	2	1	1	1	2	12	4	5	6
2	4	4	2	3		1		2	1	3	2	2	3	1	1	2	6	4	4	4
3	2	4	4	1		1		1	1	1	5	1	4	1	1	1	1	4	4	1
1	4	1	1	-99		-99		1	1	1	1	1	7	1	1	2	9	4	2	3
1	2	2	2	2		2		1	1	1	5	2	5	1	1	2	11	4	10	3
1	4	1	2	1		1		1	1	1	5	2	3	1	1	2	3	4	6	2
2	2	2	1	1		1		1	1	1	5	2	4	2	1	1	14	4	4	7
1	4	2	1	1		1		1	1	1	3	2	3	1	1	2	8	4	4	5
1	3	2	2	4		1		1	1	1	1	2	2	2	1	1	3	4	4	1
2	4	3	3	-96		-96		1	2	2	4	1	3	2	2	1	6	4	4	3
1	3	2	5	2		2		2	1	3	3	2	4	1	1	2	10	4	6	1
1	4	4	1	2		-99		2	1	3	2	2	4	1	1	2	-99	4	4	5
2	4	2	5	1		1		2	1	3	5	1	6	1	1	2	6	4	3	2
1	5	4	2	2		2		2	1	3	3	1	6	1	1	2	12	4	9	5
2	2	2	5	4		4		2	2	4	4	2	6	3	1	2	8	4	2	5
2	3	2	2	97		23		2	1	3	3	1	7	1	1	2	7	4	1	4
1	4	4	2	1		1		2	1	3	3	2	4	2	1	1	4	4	7	1
1	4	1	2	4		4		2	1	3	4	2	4	1	1	2	6	4	4	1
3	2	4	4	11		11		1	1	1	2	2	5	1	1	2	6	1	2	5
2	3	2	3	1		1		2	2	4	4	1	7	1	1	2	11	4	1	7
1	4	1	1	4		4		2	1	3	4	2	3	1	1	1	1	4	2	3
1	4	2	6					3	2	6	1	1	2	3	2	2	5	4	9	3
2	5	2	5	1		1		5	1	9	3	1	6	1	1	2	6	4	3	7
2	4	2	2	2		2		5	1	9	4	2	2	2	1	2	3	4	1	1
1	4	2	2	4		4		3	1	5	3	2	1	2	1	1	12	4	6	3
2	4	4	2	1		-98		2	1	3	4	2	2	2	2	1	7	4	9	3
1	4	2	2	2		2		1	1	1	5	2	3	1	1	2	8	4	2	1
4	2	4	5	3		3		1	2	2	2	1	6	1	1	2	9	1	2	5
4	1	4	4	51		51		3	2	6	1	1	4	1	1	2	2	4	4	2
1	2	1	4	2		2		8	1	15	5	1	6	1	1	2	5	4	2	4
3	2	4	3	3		1		1	2	2	2	2	6	1	1	2	9	4	1	7
3	2	4	2	1		38		4	2	8	3	1	5	1	1	2	4	4	2	6
1	5	2	3	1		1		4	2	8	3	1	7	1	1	2	12	4	1	4
4	1	4	2	1		38		1	1	1	5	1	4	1	1	2	5	4	1	5
3	3	4	5	1		1		6	1	11	1	2	7	3	1	2	10	4	1	7
4	2	4	4	3		1		1	2	2	1	2	6	1	1	2	8	1	2	6
3	4	4	4	13		4		1	2	2	2	1	6	1	1	2	8	4	1	5
2	4	2	3	97		2		1	2	2	2	2	5	3	1	2	13	4	1	1
1	3	2	5	97		97		4	1	7	2	3	2	1	1	1	10	4	1	2
2	2	4	5	2		2		3	2	6	2	1	7	1	1	2	12	4	2	8
1	4	3	1	4		4		2	1	3	3	3	2	1	1	2	7	4	9	3
2	5	2	5	1		1		4	2	8	1	1	6	1	1	2	4	4	2	3
1	4	1	1	2		4		5	2	10	4	2	4	1	1	2	6	4	2	2
1	4	1	1	4		4		5	2	10	2	1	6	1	1	2	13	4	2	2
2	2	4	5	2		2		3	1	5	1	2	3	1	1	2	4	4	4	7
2	2	3	5	1		1		4	1	7	2	2	4	1	1	2	7	4	6	7
4	2	2	2	2		2		3	1	5	4	1	5	1	1	2	7	4	3	5
2	2	2	2	1		1		1	1	1	5	1	4	1	1	2	12	4	4	3
1	4	2	2	2		2		2	1	3	4	2	6	1	1	2	10	4	1	4
3	2	4	3	97		97		2	2	4	1	1	4	1	1	2	4	4	2	5
1	4	1	1	97		97		4	2	8	2	1	5	1	1	2	10	4	4	6
4	-98	2	3	8		3		1	2	2	4	1	5	1	1	2	3	4	2	3
1	4	2	2	3		22		5	1	9	1	1	5	1	1	2	2	4	2	4
1	2	2	3	15		1		2	1	3	3	2	6	2	1	1	10	4	3	2
3	4	4	3	1		1		5	2	10	3	1	7	1	1	2	10	4	2	7
3	2	2	2	46		46		2	2	4	4	1	4	1	1	2	6	4	5	5
4	2	4	5	1		1		1	2	2	1	1	5	1	1	2	-98	4	2	6
2	5	4	4	1		1		3	2	6	1	1	6	1	1	2	10	-99	2	5
2	3	3	5	1		1		5	1	9	4	2	3	2	1	1	8	4	9	3
2	3	2	3	1		1		2	2	4	4	2	7	1	1	2	6	4	2	7
1	4	1	1	4		4		2	2	4	2	1	6	1	1	2	10	4	1	7
2	3	3	3	1		1		4	2	8	4	2	4	1	1	2	11	4	5	2
1	3	2	2	2		2		2	1	3	3	2	6	1	1	2	9	4	3	-97
1	3	2	2	1		1		2	1	3	5	2	4	1	1	2	-99	4	4	3
3	2	4	4	1		1		3	1	5	5	2	5	1	1	2	7	4	2	4
1	4	1	2	1		1		3	1	5	4	2	3	1	1	2	14	4	2	3
2	3	2	5	11		11		3	1	5	4	1	5	1	1	2	-99	4	2	7
3	5	2	3	3		51		1	2	2	1	1	7	1	1	2	10	4	1	5
3	2	2	5	1		51		3	1	5	4	1	6	1	1	2	2	4	2	7
1	3	2	1	2		6		3	2	6	2	1	6	1	1	2	9	4	3	3
2	2	2	5	1		1		2	2	4	4	2	6	3	1	2	9	4	2	1
1	3	2	2	1		1		1	2	2	2	2	5	1	1	2	11	4	2	7
2	3	2	2	2		97		4	1	7	2	2	6	1	1	2	8	4	2	5
3	2	2	5	51		13		3	2	6	2	1	5	1	1	2	6	4	10	4
2	2	2	5	97		-98		2	2	4	3	2	6	1	1	2	10	4	2	-97
4	1	4	5	1		38		4	1	7	3	1	7	1	1	2	10	4	2	2
3	2	4	1	1		1		2	1	3	3	1	4	1	1	2	5	4	5	9
2	4	2	5	-97		-97		5	1	9	3	1	4	1	1	2	3	4	4	5
1	4	2	4	3		13		1	2	2	2	1	3	2	1	1	2	4	4	1
1	3	4	2	2		2		5	2	10	3	2	6	1	1	2	11	4	9	8
1	2	2	2	2		2		1	2	2	2	1	6	1	1	2	10	4	2	2
1	4	1	1	2		4		1	1	1	5	2	4	3	1	2	14	4	3	1
3	1	2	3	1		1		1	1	1	4	1	7	1	1	2	5	4	2	3
3	5	4	4	3		3		2	2	4	1	2	5	1	1	2	10	4	1	-97
4	5	4	4	51		51		3	2	6	1	2	5	1	1	2	7	4	2	1
1	3	1	1	2		4		5	1	9	5	1	7	1	1	2	3	4	3	1
1	2	2	2	2		2		1	2	2	2	1	2	1	1	2	4	4	4	4
3	5	2	5	3		3		1	2	2	1	1	7	1	1	2	-99	4	2	6
1	4	2	5	2		2		2	1	3	3	1	5	2	1	1	8	4	6	3
1	3	4	3	2		2		2	2	4	1	1	4	1	1	2	10	4	1	9
3	5	2	3	51		51		3	1	5	5	1	6	1	1	2	11	4	2	3
2	3	2	2	3		3		5	2	10	2	1	4	1	1	2	2	4	3	3
1	3	1	2	2		2		1	1	1	4	2	6	1	1	2	2	4	1	1
2	2	2	3	1		1		4	1	7	1	1	7	1	1	2	7	4	2	4
1	4	1	2	4		13		1	2	2	4	2	4	1	1	2	2	4	1	4
3	2	2	3	1		1		4	2	8	2	2	7	1	1	2	10	4	2	4
2	2	2	3	1		1		1	1	1	5	1	7	1	1	2	6	4	3	4
1	5	1	1	2		5	Selection of parties	2	2	4	2	1	7	3	1	2	6	4	2	3
1	4	1	2	2		2		8	1	15	4	1	5	1	1	2	1	4	3	3
2	4	4	4	11		1		1	1	1	5	1	3	1	1	2	1	4	4	5
2	2	2	3	2		2		1	2	2	1	2	5	2	1	2	7	4	2	7
4	5	4	4	51		2		3	1	5	5	2	6	1	1	2	10	4	2	1
2	2	2	5	-99		-99		1	1	1	5	1	7	1	1	2	-99	4	2	4
1	3	2	2	2		2		4	2	8	3	1	5	3	1	2	2	4	2	1
2	3	2	3	1		1		1	2	2	3	2	5	1	1	2	8	4	2	5
2	5	2	4	1		1		2	1	3	4	2	6	1	1	2	4	4	2	7
1	4	2	2	4		4		1	2	2	1	2	6	1	1	2	7	4	2	4
4	4	4	5	1		1		4	1	7	3	1	5	1	1	2	3	4	4	5
3	2	2	5	3		1		1	2	2	2	1	5	1	1	2	3	4	2	2
3	2	2	4	1		2		1	2	2	1	1	5	1	1	2	4	4	2	5
4	2	4	4	2		2		3	1	5	1	1	5	1	1	2	2	4	2	5
2	2	2	4	1		1		1	1	1	5	1	6	2	1	2	1	4	2	1
2	5	4	5	1		1		4	1	7	1	1	4	1	1	2	1	4	3	1
1	4	2	2	2		2		3	1	5	4	2	4	3	1	2	8	4	2	1
1	3	1	2	4		47		1	1	1	2	2	5	3	2	2	14	4	3	7
3	5	4	3	51		5	Conservatives	3	1	5	4	1	3	1	1	2	1	4	5	4
1	3	2	2	4		4		2	1	3	3	1	2	2	1	1	2	4	2	6
2	4	3	5	51		2		3	1	5	3	2	3	2	1	2	5	4	4	3
2	3	2	2	1		2		2	1	3	3	2	2	2	1	1	6	4	2	3
3	5	3	4	3		3		1	2	2	4	1	5	1	1	2	5	4	2	5
3	5	4	4	1		1		2	1	3	4	1	3	1	1	2	5	4	1	4
2	4	3	3	3		2		2	1	3	3	1	2	2	1	1	7	4	4	4
1	4	3	2	-97		-97		2	1	3	5	2	3	2	2	1	4	4	2	1
1	2	3	2	-99		5	Christian Party	1	2	2	5	1	2	1	1	2	14	4	4	3
1	3	2	2	1		1		4	1	7	5	2	5	2	1	2	13	4	2	7
1	4	1	2	4		97		2	1	3	2	2	6	1	1	2	10	4	2	2
1	4	1	2	4		4		3	1	5	5	1	2	3	1	2	2	4	2	3
1	3	1	6					2	2	4	5	2	2	3	2	2	5	4	10	3
1	3	2	5	2		-97		3	1	5	5	1	1	1	1	2	11	4	10	5
3	2	3	2	-99		-99		3	2	6	3	1	2	1	1	2	6	4	10	5
1	3	2	2	-97		-97		1	2	2	3	2	5	1	1	2	13	4	2	2
1	4	1	2	4		4		3	2	6	4	2	5	1	1	2	7	4	2	6
2	2	2	3	-96		-96		3	1	5	2	1	4	2	2	1	5	4	4	1
1	4	2	2	4		4		2	1	3	4	2	5	1	1	2	9	4	1	7
1	4	1	1	4		58		3	1	5	4	1	4	1	1	2	7	4	2	3
1	4	1	2	4		4		2	1	3	5	1	5	1	1	1	-99	4	3	3
1	4	1	6	-96		-96		2	1	3	2	2	5	3	2	2	2	4	1	1
3	2	2	5	1		1		4	1	7	3	1	5	1	1	2	-99	4	1	6
2	2	1	4	-99		-99		2	1	3	5	1	1	1	1	2	14	4	3	6
1	3	1	6	-96		-96		3	2	6	2	2	6	2	2	2	7	4	9	4
1	4	1	3	2		2		1	1	1	5	1	6	1	1	2	5	4	2	3
1	4	3	2	-97		-97		5	1	9	1	2	2	2	2	1	8	4	1	3
2	5	3	3	2		2		5	1	9	1	1	5	3	1	2	3	4	2	5
2	3	3	3	4		4		3	2	6	4	2	4	1	1	2	5	4	2	5
1	4	1	1	2		2		1	1	1	3	2	4	1	1	2	1	4	6	1
1	4	2	2	2		2		5	1	9	3	2	3	1	1	2	2	4	1	3
2	4	3	3	1		1		1	1	1	1	1	2	1	1	1	5	4	5	6
1	4	1	2	1		1		2	2	4	2	2	4	2	1	1	3	4	2	2
1	3	1	2	2		2		1	2	2	5	1	7	1	1	2	3	4	2	3
1	4	2	1	4		4		2	1	3	4	2	1	2	1	1	9	4	2	6
2	3	2	4	51		51		3	1	5	5	1	4	1	1	2	2	4	4	3
1	4	2	2	2		2		1	1	1	5	2	4	1	1	2	10	4	1	3
2	3	4	5	1		1		1	2	2	3	2	6	1	1	2	9	4	1	7
1	4	2	1	4		47		1	1	1	5	1	1	2	1	1	8	4	5	3
4	5	1	2	2		4		5	1	9	3	1	4	1	1	2	7	4	1	5
1	3	1	6					2	1	3	4	2	2	2	2	1	13	4	9	1
4	2	4	4	11		11		3	1	5	2	1	5	1	1	2	4	4	3	5
1	4	2	6	-96		-96		3	2	6	3	2	2	2	2	1	4	4	2	1
4	2	4	4	1		1		5	1	9	4	1	5	1	1	1	1	4	2	3
1	4	1	3	2		2		5	1	9	4	2	3	1	1	2	12	4	4	1
1	4	1	1	2		2		1	1	1	3	1	3	1	1	2	13	4	6	1
4	4	2	1	2		4		2	1	3	4	2	7	1	1	2	10	4	1	2
1	3	2	5	11		11		5	2	10	2	2	5	1	1	2	5	4	2	4
1	4	4	2	2		2		3	2	6	4	2	2	1	1	2	7	4	7	5
1	4	2	2	2		2		3	1	5	5	2	6	1	1	2	8	4	1	2
1	4	1	1	4		4		8	1	15	4	2	1	1	1	2	5	4	3	3
1	1	3	2	4		4		1	2	2	3	2	4	1	1	2	7	4	4	5
1	4	1	2	2		2		2	1	3	5	1	2	1	1	2	5	4	2	3
2	3	2	4	1		1		5	1	9	3	1	4	1	1	2	5	4	1	3
1	3	2	2	2		2		3	2	6	4	2	6	1	1	2	10	4	1	3
2	3	4	2	-99		-99		4	-97	-97	-97	3	-97	2	1	1	-99	4	2	3
4	4	2	2	2		2		1	2	2	3	1	2	1	1	2	5	4	9	3
1	5	2	2	2		2		8	1	15	5	1	3	1	1	2	2	4	4	3
2	5	2	3	1		1		4	1	7	1	1	7	1	1	2	11	4	1	7
1	4	2	2	97		-99		1	1	1	4	2	5	1	1	2	13	4	3	3
3	4	4	4	47		47		4	2	8	1	1	5	1	1	2	11	4	1	7
1	3	2	2	1		1		3	2	6	3	1	4	3	1	2	3	4	4	1
1	4	2	2	4		4		4	1	7	5	2	6	1	1	2	12	4	2	3
2	3	2	3	51		3		3	1	5	5	2	1	1	1	2	5	4	10	3
1	4	1	1	4		4		2	1	3	4	1	3	1	1	2	2	4	2	3
1	4	1	1	4		4		8	1	15	5	1	1	1	1	2	11	4	9	6
1	4	2	2	2		2		1	2	2	2	2	4	1	1	2	10	4	4	5
1	4	1	2	2		2		3	1	5	3	1	2	1	1	2	12	4	9	5
2	2	2	2	2		2		1	1	1	5	2	2	1	1	2	6	4	2	3
1	4	1	1	4		4		5	1	9	3	2	6	3	1	2	9	4	2	2
2	4	2	5	1		1		2	1	3	5	2	2	2	1	2	5	4	2	1
1	4	1	2	4		4		2	1	3	4	1	4	1	1	2	2	4	2	1
1	4	2	2	2		2		2	1	3	2	1	2	1	1	2	5	4	3	3
2	4	4	2	1		1		2	1	3	3	1	3	2	1	1	3	4	4	1
3	2	4	5	15		15		3	2	6	3	1	5	1	1	2	10	4	4	3
2	3	2	5	1		1		5	1	9	5	2	3	3	1	2	7	4	7	1
1	3	2	2	32		32		4	1	7	2	2	2	1	1	1	7	4	6	3
3	5	4	3	2		2		1	1	1	2	1	3	2	1	1	6	4	4	1
2	4	2	6	-96		-97		4	1	7	1	2	2	1	1	2	3	4	4	5
1	4	2	2	3		3		1	1	1	4	1	2	2	1	2	7	4	1	6
2	4	2	2	-98		-98		1	2	2	2	1	4	1	1	2	9	4	1	7
2	5	1	1	2		2		2	1	3	4	1	2	2	1	1	10	4	3	6
1	4	2	2	2		2		5	1	9	4	1	4	3	1	2	2	4	7	4
1	4	3	6	-97		-97		5	1	9	3	1	3	1	1	2	1	4	4	5
2	3	2	3	1		1		2	1	3	4	2	2	1	1	2	13	4	4	4
2	2	2	3	2		2		2	1	3	3	2	5	1	1	2	8	4	3	5
1	4	1	2	4		4		1	1	1	5	1	2	1	1	2	4	4	9	3
2	5	2	2	2		2		5	1	9	2	1	5	2	1	2	6	4	3	7
1	3	2	2	1		1		5	1	9	2	2	6	1	1	2	11	4	2	3
4	5	4	4	1		1		2	1	3	4	1	3	2	2	1	2	4	4	3
2	3	1	5	2		2		3	2	6	3	1	2	2	1	1	6	4	4	1
1	4	2	2	1		1		2	1	3	5	2	1	1	1	2	6	4	9	3
2	4	2	2	4		4		1	1	1	5	1	2	1	1	1	9	4	9	3
1	4	1	2	1		23		2	1	3	5	2	5	1	1	2	3	4	10	1
1	3	2	2	1		1		6	1	11	3	2	7	1	1	2	12	4	10	4
1	4	2	2	2		2		1	2	2	1	2	5	1	1	2	7	4	2	5
2	3	2	5	2		1		3	1	5	1	2	2	1	1	2	5	4	2	2
1	4	4	2	-97		-97		1	1	1	1	2	2	2	1	1	6	4	9	3
1	4	2	2	4		2		1	1	1	2	1	6	3	1	2	8	4	2	1
3	5	2	3	4		4		8	1	15	5	1	1	2	1	2	14	4	9	6
4	4	1	1	2		2		2	1	3	4	1	6	2	1	2	6	4	1	3
4	-98	4	3	13		13		1	1	1	3	1	4	1	1	2	1	4	1	4
1	3	2	5	4		4		4	2	8	2	2	5	1	1	2	15	4	2	7
1	5	4	2	2		2		1	1	1	2	1	3	2	1	2	4	4	9	5
1	4	1	6	1		1		2	1	3	5	1	4	2	1	1	14	4	4	1
1	3	1	2	2		2		5	1	9	4	1	5	3	1	2	2	4	3	1
2	3	2	3	1		1		3	1	5	4	2	5	1	1	2	8	4	2	5
1	3	1	6	-97		-97		3	1	5	4	2	2	1	1	2	14	4	4	6
2	2	4	3	1		1		2	2	4	5	2	2	1	1	2	5	4	4	4
1	3	2	2	2		2		1	1	1	3	1	2	1	1	2	4	4	2	5
1	3	2	2	1		4		1	2	2	4	2	4	1	1	2	7	4	4	3
1	2	2	3	1		1		5	1	9	4	2	2	3	1	1	4	4	4	3
1	4	3	2	4		4		1	1	1	5	1	4	3	1	2	7	4	9	7
2	4	2	2	1		1		1	1	1	5	2	3	1	1	2	1	4	4	2
2	4	2	2	2		2		3	1	5	1	1	6	1	1	2	10	4	6	3
1	4	2	3	1		-98		1	2	2	3	1	5	1	1	2	8	4	1	9
1	4	1	1	4		4		1	1	1	4	1	5	1	1	2	6	4	2	3
1	4	2	1	2		2		2	1	3	5	2	4	1	1	2	9	4	4	3
1	4	2	2	2		2		1	2	2	5	2	4	1	1	2	7	4	4	6
3	2	4	4	1		1		1	1	1	2	1	5	3	1	2	4	4	3	6
1	4	1	1	1		1		2	1	3	4	1	2	1	1	2	3	4	1	4
1	3	2	1	2		4		1	1	1	5	2	2	1	1	2	10	4	3	6
1	4	2	1	2		2		2	1	3	5	2	3	1	1	2	5	4	4	1
1	4	2	2	4		4		1	2	2	1	2	3	1	1	2	12	4	1	3
4	4	1	1	2		4		4	1	7	1	1	5	1	1	2	6	4	6	5
4	3	2	6	-96		-96		1	1	1	4	1	4	3	2	2	1	4	2	4
1	3	2	5	-99		1		3	1	5	5	2	6	3	1	2	10	4	2	6
2	2	4	5	11		4		3	2	6	1	2	5	1	1	2	10	4	1	4
1	4	1	1	2		2		1	1	1	5	1	1	2	1	2	14	4	3	6
2	5	4	4	2		2		1	2	2	3	1	4	3	2	2	10	4	4	7
1	4	1	1	51		51		3	2	6	3	2	2	1	1	1	7	4	9	1
1	4	1	2	-99		-99		4	2	8	4	2	4	3	1	2	3	4	2	4
1	2	2	2	51		2		3	1	5	3	1	4	1	1	2	10	1	10	9
1	4	2	1	4		4		5	1	9	2	2	5	1	1	2	2	4	2	4
1	3	1	2	2		4		3	1	5	1	2	5	1	1	2	7	4	7	5
1	4	4	1	2		2		1	2	2	3	2	3	3	1	2	6	4	2	3
1	4	2	1	2		4		6	1	11	4	2	4	1	1	2	3	4	4	2
2	3	2	2	4		4		2	1	3	5	1	2	1	1	1	5	4	1	3
2	3	3	5	15		15		2	2	4	4	1	5	1	1	2	11	4	1	5
1	3	2	1	2		2		4	2	8	1	2	5	1	1	2	10	4	1	4
1	4	1	2	27		27		4	1	7	3	2	6	1	1	2	10	4	6	7
1	2	2	3	2		2		2	1	3	5	1	6	1	1	2	7	4	2	1
3	1	2	2	-97		-96		2	1	3	4	2	4	2	2	2	14	4	4	7
1	3	2	2	2		2		2	2	4	2	1	5	1	1	2	2	4	2	2
1	3	2	2	2		2		2	1	3	5	1	6	1	1	2	6	4	2	2
2	2	4	4	1		1		1	2	2	2	2	7	1	1	2	12	4	2	2
1	3	1	2	1		1		1	1	1	4	1	3	3	2	2	1	4	4	1
1	3	2	2	2		2		5	2	10	1	2	7	1	1	2	9	4	9	1
4	5	3	4	3		3		1	2	2	2	1	6	1	1	2	6	4	9	7
4	4	2	2	2		2		6	2	12	1	1	6	3	1	2	9	4	1	3
1	4	2	2	2		2		1	2	2	3	2	5	3	2	2	2	4	4	1
1	3	2	2	2		4		3	1	5	3	1	2	1	1	2	4	4	4	6
4	2	4	4	1		1		2	1	3	5	1	5	1	1	2	5	4	2	6
1	5	1	1	2		2		2	1	3	4	1	1	1	1	2	10	4	9	6
3	2	2	3	-97		-97		2	2	4	3	1	4	1	1	1	4	4	6	2
4	3	4	4	1		1		2	1	3	3	1	2	1	1	2	3	4	1	3
1	4	2	1	4		4		1	2	2	2	2	4	1	1	2	4	4	4	3
2	2	2	3	1		1		3	2	6	4	2	5	1	1	2	12	4	10	7
2	5	2	3	1		1		6	2	12	1	1	4	1	1	2	-99	4	4	-97
1	4	2	2	2		2		1	2	2	3	2	5	1	1	2	6	4	3	3
3	2	4	5	51		51		3	2	6	2	1	4	2	1	2	8	4	5	4
2	2	2	2	51		51		3	2	6	4	1	7	1	1	2	11	4	1	4
1	2	1	3	2		2		3	2	6	3	2	3	1	1	2	6	4	4	5
2	4	2	2	2		2		5	1	9	4	1	6	2	1	1	4	4	4	5
1	4	1	1	4		4		1	1	1	5	2	4	1	1	2	8	4	4	1
1	2	2	5	-97		-97		3	1	5	5	2	6	1	1	2	11	4	1	5
1	4	2	2	97		58		8	1	15	5	2	6	2	1	1	11	4	3	1
2	2	3	3	97		97		6	2	12	2	1	2	1	1	2	6	4	4	4
2	4	2	2	1		1		2	1	3	4	1	3	2	1	1	2	4	4	6
3	5	4	5	3		1		1	2	2	1	2	5	2	1	2	12	4	2	5
1	3	2	2	2		2		3	2	6	1	2	7	3	1	2	5	4	2	7
1	3	2	6	-97		-97		3	1	5	3	1	5	3	2	2	2	4	2	5
2	5	2	3	1		1		1	1	1	4	1	2	1	1	2	9	4	2	3
2	5	4	5	25		17		2	1	3	4	1	4	1	1	2	1	4	4	1
1	4	1	2	4		2		2	1	3	3	1	5	1	1	2	7	4	10	1
2	4	4	5	1		1		2	2	4	2	2	3	1	1	2	5	4	4	5
1	3	3	2	4		4		5	1	9	4	2	3	1	1	2	7	4	7	3
1	4	2	2	4		4		2	1	3	3	2	2	1	1	2	7	4	1	3
1	4	1	2	4		4		2	2	4	3	1	6	1	1	2	4	4	2	4
2	3	2	5	3		3		1	2	2	2	2	4	1	1	2	6	4	2	7
2	5	4	4	-99		-99		2	1	3	4	2	6	1	1	2	14	4	1	5
2	1	2	3	51		51		3	1	5	5	2	5	1	1	2	13	4	4	7
1	4	2	2	2		2		2	1	3	5	2	6	1	1	2	7	4	2	4
2	2	2	2	1		1		1	1	1	2	2	5	2	1	1	4	4	3	3
1	3	2	2	1		1		5	1	9	5	2	7	3	1	2	8	4	1	2
1	3	1	1	4		4		4	1	7	3	2	7	1	1	2	5	4	1	9
1	4	2	2	32		32		1	2	2	4	3	5	1	1	2	10	4	1	4
1	4	1	1	2		2		2	2	4	5	2	6	1	1	2	8	4	1	2
2	4	2	4	2		2		3	1	5	4	1	4	1	1	1	6	4	4	5
1	3	1	3	97		2		4	1	7	5	1	5	1	1	2	2	4	2	3
1	4	4	2	2		2		3	1	5	4	2	2	1	1	1	2	4	4	3
3	2	4	3	1		1		2	1	3	5	2	5	1	1	2	5	4	10	3
2	5	4	5	1		1		4	1	7	5	1	4	1	1	2	15	4	4	5
1	1	4	2	2		2		2	2	4	2	2	2	1	1	2	11	4	4	7
1	4	2	2	2		2		2	1	3	4	2	4	1	1	2	6	4	4	2
2	2	4	5	2		2		5	2	10	3	2	4	1	1	2	15	4	4	2
3	2	4	5	2		2		3	1	5	5	1	5	1	1	2	7	4	4	5
2	2	3	2	2		2		2	1	3	4	1	3	3	1	1	8	4	2	6
1	4	2	2	2		2		4	1	7	2	2	5	2	1	2	4	4	4	3
3	5	4	4	1		1		1	1	1	5	1	6	1	1	2	2	4	3	1
1	3	4	3	2		2		1	2	2	3	1	7	1	1	2	10	4	2	9
2	4	2	5	1		1		4	1	7	1	2	5	3	1	2	9	4	2	7
1	4	1	1	4		4		8	1	15	5	1	4	2	1	2	6	4	4	2
2	3	2	2	2		2		6	2	12	1	2	2	1	1	2	-99	4	4	6
2	3	2	3	1		1		1	1	1	5	2	2	1	1	2	3	4	4	3
2	3	2	5	1		1		5	1	9	5	2	6	1	1	2	9	4	2	3
1	-98	2	2	2		2		6	1	11	1	2	3	1	1	2	3	4	9	1
2	3	4	6					5	2	10	1	1	3	2	2	1	7	4	4	5
1	4	2	2	2		4		4	1	7	5	2	6	2	1	2	8	4	2	1
2	2	2	2	2		2		3	2	6	1	2	5	1	1	2	13	4	2	4
2	3	4	4	3		1		1	2	2	3	2	7	1	1	2	4	4	2	-97
2	3	4	3	1		1		4	2	8	1	2	2	1	1	2	6	4	4	5
3	2	4	4	11		11		6	2	12	1	2	5	1	1	2	10	4	1	5
2	2	4	5	-98		-98		1	2	2	1	1	2	1	1	2	14	1	9	5
1	4	1	2	1		1		3	1	5	4	1	2	1	1	2	2	4	2	3
3	5	3	5	1		1		5	1	9	3	1	7	2	1	1	10	4	2	5
1	3	2	2	4		4		4	2	8	1	1	1	1	1	2	8	4	1	3
1	3	1	2	-96		-96		5	1	9	3	2	2	2	1	1	3	4	9	6
2	3	2	3	2		2		1	2	2	2	1	5	1	1	2	3	4	4	4
2	2	3	4	1		23		2	1	3	5	2	5	3	1	2	6	4	2	5
1	4	1	2	2		2		2	1	3	1	1	4	1	1	2	5	4	2	6
1	2	2	2	2		2		2	1	3	5	2	1	1	1	2	12	4	5	6
2	3	2	5	3		3		5	2	10	2	2	2	1	1	2	6	4	9	2
2	2	2	4	1		1		1	1	1	5	1	5	1	1	2	5	4	3	1
1	3	2	5	1		1		2	2	4	3	2	7	1	1	2	10	4	1	9
1	5	1	2	1		1		3	2	6	4	1	5	3	1	2	2	4	3	4
2	4	2	3	1		1		5	1	9	4	1	4	3	1	2	1	4	4	3
2	5	2	2	1		1		1	2	2	3	2	7	3	1	2	3	4	2	6
2	3	2	2	2		2		1	2	2	-97	2	1	1	1	2	11	4	9	6
3	2	2	5	2		46		3	2	6	3	1	3	1	1	2	2	4	4	5
2	3	4	4	1		3		1	2	2	2	2	4	1	1	2	7	4	3	7
1	4	2	1	4		4		2	1	3	4	2	2	1	1	2	7	4	2	2
3	3	4	3	3		2		2	1	3	5	2	1	1	1	2	6	4	10	6
2	2	2	4	51		51		3	2	6	2	2	4	2	1	2	3	4	1	2
3	2	4	4	51		51		3	1	5	4	1	7	1	1	2	7	4	2	5
1	3	2	2	2		4		2	1	3	5	2	1	2	1	2	9	4	4	2
2	5	4	5	11		11		3	2	6	2	2	4	1	1	2	1	4	3	7
1	3	1	1	4		4		1	1	1	4	1	2	3	2	2	1	4	2	1
2	2	4	5	-96		-96		5	1	9	3	2	3	2	2	2	14	4	4	3
4	2	2	2	1		1		4	1	7	1	1	6	3	1	2	10	4	2	5
1	3	2	5	1		1		5	1	9	3	1	4	1	1	2	2	4	4	1
2	-98	4	5	-96		-96		5	1	9	3	2	3	3	2	1	3	4	4	-97
1	4	2	2	4		4		5	1	9	3	1	2	1	1	2	5	4	3	5
2	4	4	3	1		1		1	1	1	5	1	4	1	1	2	11	4	9	1
2	5	2	5	11		11		3	1	5	5	1	3	1	1	2	5	4	4	3
2	2	2	5	2		2		1	1	1	1	2	2	1	1	2	13	4	4	7
2	2	3	5	1		-98		4	1	7	3	2	7	1	1	2	10	1	2	3
2	2	2	4	3		51		1	1	1	5	1	6	1	1	2	11	4	2	3
1	4	1	2	2		2		1	1	1	5	2	6	1	1	2	5	4	2	1
2	3	2	5	2		2		2	1	3	4	2	5	2	1	1	9	4	1	5
2	4	2	6	-96		-96		3	1	5	4	1	3	3	2	2	4	4	10	4
2	4	2	6					2	1	3	5	1	2	3	2	2	5	4	9	2
1	3	2	6	-96		-96		1	1	1	3	1	3	2	2	1	3	4	2	2
1	3	4	5	4		4		5	1	9	5	1	2	1	1	2	6	4	1	5
2	2	2	5	2		2		1	1	1	3	2	1	1	1	2	7	1	7	5
3	4	2	4	1		8		1	1	1	1	1	5	1	1	2	9	4	5	5
3	4	2	4	-97		-97		2	1	3	5	1	3	2	1	1	4	4	4	1
2	1	2	3	2		4		3	1	5	3	1	3	2	2	1	8	4	1	2
1	4	2	3	-96		-96		1	1	1	5	1	2	2	2	1	4	4	4	3
1	4	1	2	2		2		1	1	1	2	1	2	1	1	2	4	4	10	3
4	2	2	4	8		11		1	1	1	5	1	5	1	1	2	2	4	2	6
2	4	2	3	1		1		2	1	3	5	1	3	2	1	1	1	4	4	1
1	4	1	1	2		4		2	1	3	5	2	3	1	1	1	-99	4	2	1
1	4	2	2	4		4		1	1	1	3	2	3	1	1	2	6	4	4	6
2	3	2	2	-96		-96		2	1	3	2	2	1	2	2	1	8	4	2	4
1	4	1	1	4		4		1	1	1	5	1	2	1	1	2	2	4	9	3
2	2	4	4	-97		-97		2	1	3	5	1	3	2	1	1	2	4	4	2
1	4	2	1	2		2		1	1	1	5	1	7	3	1	2	-99	4	2	3
1	3	2	2	4		1		2	2	4	1	1	6	2	1	2	9	4	6	1
1	4	2	6	-96		-96		5	1	9	1	1	3	3	1	2	3	4	9	4
1	4	2	-99	-99		-99		1	1	1	2	1	3	2	1	2	1	4	2	5
1	4	3	6	-97		-97		1	2	2	2	2	4	1	1	2	5	1	2	5
1	3	2	2	97		2		1	2	2	3	2	6	1	1	2	8	4	1	1
2	5	2	2	4		-97		8	1	15	5	1	6	1	1	2	11	4	1	9
1	4	2	1	2		4		1	1	1	2	1	6	1	1	2	8	4	1	1
1	4	2	1	32		4		2	2	4	2	2	6	1	1	2	10	4	1	1
3	2	4	5	1		1		2	2	4	5	1	6	3	1	2	10	4	2	2
1	3	1	6	-97		-97		1	2	2	1	1	7	3	2	2	11	4	2	5
1	4	2	2	2		2		2	2	4	2	2	5	1	1	2	8	4	1	5
3	3	2	3	1		1		1	2	2	1	1	5	1	1	2	9	4	1	7
1	4	1	2	2		1		7	1	13	5	1	2	1	1	2	2	4	2	4
1	3	2	6	-97		-97		1	1	1	1	1	3	1	1	1	6	4	2	4
1	3	2	2	2		2		1	2	2	1	2	1	1	1	2	11	4	9	6
2	4	2	5	32		5	Minor Party	4	1	7	5	2	4	2	1	1	-99	4	2	1
1	3	1	1	2		2		1	2	2	3	1	2	1	1	2	6	4	4	5
1	4	1	2	2		2		5	1	9	5	2	3	1	1	2	1	4	4	3
1	4	2	2	2		2		1	1	1	3	1	2	1	1	2	8	4	9	4
2	5	4	4	51		51		3	1	5	1	1	2	1	1	2	6	4	4	5
2	3	2	2	3		3		5	2	10	4	1	2	1	1	2	5	4	9	6
3	5	4	5	1		1		5	1	9	5	1	5	1	1	2	2	4	4	1
3	2	4	5	1		1		4	1	7	3	1	7	1	1	2	7	4	2	7
4	2	4	4	2		2		2	2	4	1	1	1	1	1	2	9	4	3	5
1	4	2	2	4		4		4	2	8	1	1	6	3	1	2	10	4	2	3
1	5	2	3	2		4		6	2	12	1	1	3	1	1	2	6	4	9	6
1	3	1	1	2		2		1	1	1	5	1	5	1	1	2	4	4	2	3
1	4	2	1	-98		-98		4	1	7	5	1	2	1	1	2	7	4	9	5
1	4	1	2	2		4		1	2	2	1	2	3	2	2	2	10	4	4	-97
1	4	2	2	2		97		6	1	11	4	2	4	1	1	2	8	4	4	1
2	3	2	3	2		2		3	2	6	2	2	2	1	1	2	5	4	4	3
1	3	3	3	1		1		3	1	5	2	2	6	3	1	2	10	4	2	2
1	3	1	1	2		2		1	1	1	5	2	1	1	1	1	13	4	4	6
2	3	2	1	2		2		1	1	1	2	1	4	2	1	1	4	4	1	6
1	4	2	6	-96		-96		6	1	11	4	1	1	2	2	2	9	4	10	3
1	3	1	6	-96		-96		1	1	1	3	1	7	2	2	2	8	4	9	4
1	5	4	6	-96		-96		3	1	5	2	1	6	3	2	2	6	4	3	2
2	2	2	3	1		1		1	2	2	1	1	5	1	1	2	10	4	2	5
1	5	2	4	2		2		2	1	3	3	1	2	1	1	2	7	4	3	2
3	5	4	5	1		1		7	1	13	2	2	2	2	2	1	5	4	4	6
1	2	2	3	51		51		3	1	5	5	1	7	1	1	2	5	4	2	9
1	3	2	2	4		4		1	1	1	2	2	4	3	1	2	2	4	1	3
3	1	4	4	1		1		1	1	1	2	1	6	1	1	2	14	4	3	5
1	4	2	2	4		4		5	1	9	5	2	5	1	1	2	14	4	2	-97
4	5	4	5	1		1		3	1	5	3	1	3	2	1	2	3	4	4	3
1	3	2	2	1		1		1	1	1	3	2	2	2	1	1	6	4	2	4
1	4	2	2	-99		-99		3	1	5	3	2	4	2	1	2	8	4	2	6
2	4	1	2	-97		-97		1	1	1	5	1	3	2	1	2	3	4	4	3
2	3	-98	5	-99		-99		5	1	9	4	2	3	1	1	2	4	4	4	3
2	4	2	2	4		4		2	2	4	3	2	2	1	1	2	6	4	2	6
1	2	2	2	1		1		1	1	1	3	2	6	1	1	2	9	4	2	5
1	5	1	2	2		2		6	1	11	3	1	1	1	1	2	13	4	4	6
4	2	4	4	6		6		3	2	6	2	1	5	1	1	2	10	4	1	6
3	2	3	5	1		1		5	1	9	4	1	1	1	1	2	11	4	3	6
2	3	2	2	-96		-96		1	1	1	2	1	3	2	2	1	13	4	9	1
2	2	4	4	1		1		5	2	10	3	1	4	2	1	1	14	4	5	4
1	4	2	1	2		2		1	2	2	4	1	4	1	1	2	7	4	4	1
1	4	2	2	-97		2		2	2	4	2	2	6	1	1	2	8	4	2	5
3	3	2	4	4		4		2	2	4	3	2	2	1	1	2	9	4	7	1
1	3	2	2	1		1		3	1	5	5	2	4	1	1	2	1	4	4	3
1	3	4	6	-96		-96		2	1	3	4	2	1	2	2	1	14	4	9	3
-99	5	4	5	1		1		5	1	9	5	2	7	3	1	2	-99	4	3	3
1	3	2	6	-97		-97		1	1	1	4	1	4	1	1	2	14	4	1	9
1	3	4	5	4		2		1	2	2	2	2	3	1	1	2	10	4	7	7
4	2	4	5	1		1		2	1	3	4	1	4	1	1	1	1	4	1	7
4	5	4	5	1		1		1	1	1	1	2	2	1	1	1	6	4	5	3
1	4	2	2	2		2		1	1	1	2	2	5	1	1	2	10	4	1	4
3	2	4	4	30		30		6	2	12	1	1	5	3	1	2	6	4	2	7
2	5	1	2	1		1		3	2	6	4	1	5	3	1	2	5	4	2	3
1	4	2	1	4		2		2	2	4	5	1	1	1	1	2	13	4	4	6
2	2	2	4	-99		-99		3	1	5	4	2	5	1	1	2	15	4	8	2
3	1	4	4	1		1		1	1	1	5	1	6	1	1	2	6	4	10	1
1	3	2	6	-96		-96		2	1	3	4	2	4	3	2	2	6	4	3	6
1	3	1	2	2		2		2	1	3	2	2	5	1	1	2	7	4	1	6
1	3	2	1	4		4		2	2	4	3	2	6	3	1	2	5	4	1	1
1	4	1	1	-97		-99		3	1	5	1	2	3	1	1	1	10	4	10	3
1	4	2	1	4		4		1	2	2	3	3	1	1	1	2	11	4	7	3
2	5	2	2	1		1		4	1	7	3	2	7	1	1	2	10	4	2	9
2	2	4	5	1		1		1	2	2	2	2	2	1	1	2	12	4	10	3
1	5	2	3	1		1		2	2	4	2	1	6	1	1	2	8	4	2	9
1	4	2	6					2	2	4	3	1	1	1	1	2	12	4	10	7
1	3	2	1	2		2		7	1	13	3	1	3	1	1	2	2	4	7	4
2	4	2	2	-99		-99		2	2	4	4	1	1	1	1	2	14	4	4	5
3	1	4	4	51		51		3	2	6	2	1	7	1	1	2	11	4	2	9
1	4	1	6	-96		-96		1	1	1	3	1	1	2	2	1	-99	4	10	6
1	4	1	2	4		4		2	1	3	5	1	3	3	1	2	5	4	9	1
1	3	2	1	2		4		6	2	12	2	2	6	1	1	2	9	4	1	2
1	4	2	3	32		32		2	1	3	3	2	2	1	1	2	-99	4	1	5
1	3	1	2	2		4		2	2	4	5	1	5	1	1	2	11	4	1	1
2	3	2	5	1		1		2	1	3	4	2	3	1	1	2	7	4	4	5
4	1	4	4	51		51		3	2	6	1	1	7	2	1	2	7	4	2	6
2	4	4	3	1		1		2	1	3	5	1	5	3	1	2	6	4	2	5
1	4	2	3	1		1		5	1	9	5	1	4	1	1	2	1	4	4	3
2	2	4	2	-99		-99		2	1	3	5	1	5	1	1	2	8	4	3	2
2	5	4	4	1		1		2	1	3	5	1	3	1	1	2	6	4	4	4
2	2	3	2	1		2		1	2	2	2	2	6	1	1	2	9	4	2	7
2	4	2	5	2		2		1	2	2	2	2	5	1	1	2	5	4	2	6
1	3	2	2	2		4		3	1	5	5	1	5	1	1	2	1	4	2	1
1	4	2	2	2		2		1	2	2	2	2	5	1	1	2	3	4	1	1
2	5	2	2	2		2		1	1	1	2	1	2	-99	1	1	-99	4	-99	2
1	4	2	3	97		2		1	1	1	5	1	6	1	1	2	8	4	1	2
1	3	2	2	4		4		5	2	10	2	1	6	3	1	2	5	4	2	4
2	2	2	3	1		1		4	1	7	3	1	7	1	1	2	10	4	2	-97
3	2	4	4	3		1		1	2	2	1	1	6	1	1	2	10	4	2	5
1	2	2	6	-97		-97		3	2	6	3	1	1	1	1	2	12	4	3	5
3	5	3	3	1		1		8	1	15	5	1	1	1	1	1	12	4	3	6
1	4	1	1	2		2		2	2	4	3	1	6	2	1	2	10	4	2	8
1	3	2	6	-96		-96		1	1	1	4	1	2	2	2	2	2	4	9	1
1	2	2	2	2		4		5	1	9	2	1	6	1	1	2	8	4	2	3
1	3	2	6	-97		-97		5	1	9	5	2	4	3	1	2	2	4	4	7
1	3	2	2	-98		-98		3	2	6	3	2	-97	1	1	2	12	1	2	7
2	3	4	4	11		4		1	1	1	2	2	5	1	1	2	9	4	3	5
1	3	1	1	-96		-96		4	1	7	4	1	4	2	2	2	4	4	1	1
1	3	1	1	4		4		8	1	15	5	1	5	1	1	2	4	4	4	3
1	4	4	1	4		4		1	2	2	2	2	6	3	1	2	11	4	10	6
2	3	2	6	-96		-96		5	2	10	2	1	3	2	2	1	12	4	4	3
3	3	4	3	1		1		5	1	9	2	1	4	1	1	2	6	4	4	4
1	3	4	5	2		2		1	2	2	1	1	2	1	1	2	8	4	6	5
2	3	2	5	2		2		1	2	2	4	1	1	1	1	2	13	4	3	-97
2	3	2	3	1		4		3	1	5	5	2	1	1	1	1	14	4	9	6
1	4	2	1	4		4		5	2	10	5	2	4	1	1	2	9	4	7	3
1	3	1	1	2		2		2	1	3	5	1	2	2	1	1	2	4	4	3
2	3	2	5	2		2		2	1	3	5	1	1	1	1	1	14	4	5	6
1	4	2	2	-98		-98		2	1	3	2	1	2	2	2	1	10	4	2	2
1	4	1	1	4		4		3	1	5	4	2	2	1	1	2	11	4	10	5
1	4	2	2	2		2		1	1	1	5	1	1	1	1	1	12	4	3	6
1	5	1	2	5	Socialist party	4		5	1	9	3	1	1	1	1	2	12	4	9	6
2	3	2	6					2	1	3	3	1	1	2	2	1	5	4	1	9
1	4	1	1	4		4		2	1	3	3	2	1	1	1	2	12	1	9	7
2	5	2	2	2		2		5	1	9	5	1	2	2	2	1	9	4	9	5
2	3	2	3	47		1		5	1	9	3	1	1	1	1	2	9	4	8	5
1	4	2	1	4		4		2	1	3	5	2	3	3	1	2	5	4	2	6
1	3	2	5	-99		-99		4	2	8	3	2	4	1	1	2	6	4	2	6
1	4	2	3	4		4		8	1	15	4	1	4	1	1	2	8	4	2	-97
2	4	2	5	2		2		3	1	5	2	2	1	1	1	2	10	4	4	6
2	2	2	2	4		1		5	1	9	1	2	2	1	1	2	6	4	4	6
1	4	1	2	4		2		5	1	9	5	1	2	1	1	2	10	4	9	6
1	4	2	1	2		2		1	1	1	5	1	1	1	1	1	12	4	4	6
1	3	2	1	2		4		2	1	3	5	2	2	1	1	2	2	4	2	3
1	3	2	5	1		1		5	2	10	4	1	3	1	1	2	10	4	1	5
1	4	2	2	-96		-96		3	1	5	4	2	2	2	2	1	14	4	3	3
1	4	1	1	4		4		2	1	3	1	1	2	1	1	1	12	4	3	3
1	4	1	1	2		2		1	1	1	4	2	3	1	1	2	4	4	4	2
1	2	2	2	3		3		1	2	2	2	2	4	2	1	1	3	4	2	3
1	3	1	2	2		2		5	1	9	5	2	4	3	1	2	2	4	1	1
1	5	1	2	1		1		1	2	2	5	1	3	1	1	2	1	4	4	1
1	3	2	1	4		4		3	1	5	5	2	3	1	1	2	5	4	4	1
1	3	2	5	2		2		2	1	3	2	2	1	2	1	1	14	4	5	6
2	5	2	4	11		1		1	1	1	5	1	4	3	1	2	1	4	3	5
1	4	2	1	4		4		3	1	5	5	1	3	1	1	2	4	4	2	2
2	4	1	2	1		1		3	2	6	3	1	4	1	1	2	4	4	5	5
2	2	2	2	1		1		1	1	1	5	1	4	1	1	2	13	4	2	6
1	4	1	1	4		4		2	1	3	1	2	2	1	1	2	9	4	7	4
1	4	2	6	-96		-96		2	2	4	4	2	4	3	2	2	6	4	3	4
4	3	4	4	2		2		3	1	5	3	1	3	2	1	1	2	4	4	1
1	5	2	2	97		28		2	2	4	4	1	2	1	1	2	2	4	4	3
2	2	2	2	-96		-96		2	1	3	2	2	2	3	2	2	9	4	4	6
2	4	2	5	2		2		2	1	3	4	2	2	2	1	1	6	4	9	1
1	3	2	2	2		2		4	1	7	2	2	4	1	1	2	7	4	5	5
1	4	2	6	-96		-96		1	1	1	5	1	3	2	2	1	2	4	4	3
1	4	2	5	2		2		2	1	3	2	2	2	1	1	2	4	4	9	1
1	4	2	2	4		4		1	1	1	5	1	2	1	1	2	2	4	2	2
2	2	2	5	38		38		1	1	1	1	2	4	1	1	2	8	4	4	4
1	3	1	3	2		2		3	1	5	1	2	4	1	1	2	6	4	1	6
1	3	2	2	-97		-97		2	1	3	4	1	2	2	2	1	5	4	4	3
2	5	2	2	-97		-97		8	1	15	4	1	1	1	1	2	5	-98	10	3
1	4	2	2	2		2		2	1	3	4	2	3	1	1	2	9	4	4	4
1	4	2	5	2		2		2	1	3	4	1	4	2	1	2	5	4	2	5
1	4	1	1	-96		-96		3	2	6	4	2	1	3	2	2	6	4	5	3
1	4	2	1	4		4		3	1	5	5	2	3	1	1	2	5	4	9	3
1	4	1	2	2		2		8	1	15	5	1	3	1	1	2	12	4	4	3
1	4	2	-98	-98		-98		3	1	5	2	1	1	1	1	2	-98	4	4	9
4	5	2	1	2		2		1	1	1	5	2	4	1	1	2	2	4	5	1
1	3	2	2	4		4		2	1	3	2	1	2	1	1	2	11	4	-99	6
1	4	2	1	4		4		5	1	9	1	2	2	1	1	2	9	4	9	5
1	3	2	2	2		2		3	2	6	3	1	3	1	1	2	2	4	4	1
1	4	2	1	4		4		1	1	1	3	1	2	2	2	1	6	4	9	1
2	3	2	2	4		2		4	1	7	2	2	4	1	1	2	4	4	7	4
2	3	4	2	-97		-97		5	1	9	5	2	2	2	2	1	8	4	9	3
1	4	2	2	2		4		2	1	3	2	1	3	1	1	2	14	4	4	1
1	3	2	2	2		-97		2	2	4	2	1	4	1	1	2	3	4	4	3
1	4	2	2	4		4		3	1	5	3	2	3	1	1	2	5	4	4	3
1	4	2	2	-99		-99		1	1	1	5	2	3	1	1	2	2	4	2	3
2	4	4	5	1		1		4	1	7	2	2	4	2	1	1	7	4	4	1
4	3	4	6	-96		-96		8	1	15	5	1	2	2	2	1	14	4	1	1
3	2	4	5	2		2		3	1	5	2	2	4	1	1	2	12	4	4	5
1	3	2	2	20		2		2	1	3	2	1	4	1	1	2	12	4	1	5
1	4	1	2	2		4		2	1	3	5	2	3	1	1	2	9	4	4	3
2	2	2	5	-99		-99		3	1	5	3	1	5	1	1	2	-99	4	2	5
2	2	4	2	3		1		3	1	5	3	2	1	2	2	1	9	4	6	4
1	2	2	2	1		32		1	1	1	5	2	3	3	1	2	2	4	1	2
2	2	2	3	2		2		2	1	3	1	2	3	2	1	1	7	4	2	1
1	2	3	2	2		2		4	1	7	4	1	4	1	1	1	7	4	4	6
1	4	4	1	1		1		2	1	3	4	2	3	1	1	2	14	4	4	7
1	3	4	2	2		2		3	2	6	3	1	3	1	1	2	10	4	4	5
1	4	1	1	97		4		6	1	11	5	2	3	3	1	2	1	4	4	-97
1	4	2	2	1		2		2	2	4	2	2	4	1	1	2	12	4	4	5
1	4	3	3	-97		-97		1	1	1	1	1	3	2	2	2	11	4	9	4
4	3	3	2	2		2		2	1	3	3	3	3	2	1	1	7	4	3	3
1	5	2	1	4		4		1	2	2	3	1	1	1	1	2	13	4	9	6
1	4	2	2	4		4		1	1	1	5	2	2	3	1	1	9	4	9	1
4	-98	2	5	1		2		2	1	3	1	2	1	1	1	2	13	4	9	6
2	4	2	6	-97		-97		2	2	4	4	1	2	1	1	2	8	4	4	6
2	4	2	3	2		4		1	1	1	5	1	3	1	1	2	2	4	4	4
1	4	1	2	2		4		1	1	1	5	1	4	1	1	2	2	4	4	1
2	5	4	3	58		58		1	1	1	5	2	3	2	1	2	-99	4	3	2
1	4	2	1	2		2		1	1	1	2	1	3	3	2	2	2	4	5	7
2	3	4	6	-96		-96		1	1	1	1	1	4	1	2	1	6	4	4	3
2	4	4	5	1		1		3	1	5	4	2	4	1	1	2	7	4	4	4
1	4	4	5	2		2		4	1	7	3	2	2	1	1	1	7	4	2	3
1	4	1	6					5	1	9	4	2	4	2	2	2	6	4	1	4
1	3	1	2	1		1		4	1	7	2	1	1	2	1	2	11	4	5	6
1	5	1	2	4		4		5	1	9	4	2	2	1	1	1	2	4	9	1
1	4	2	5	2		2		1	1	1	1	2	4	1	1	2	5	4	3	7
4	2	4	4	1		1		1	2	2	3	2	4	1	1	2	7	4	2	2
4	4	4	2	-99		-99		3	1	5	5	1	4	1	1	2	14	4	3	2
2	3	4	5	1		1		3	1	5	4	2	4	1	1	2	2	4	4	6
1	3	2	1	2		2		4	1	7	3	2	4	2	1	2	1	4	4	6
1	4	2	2	97		2		1	1	1	5	1	2	1	1	2	6	4	5	3
1	4	2	2	2		2		4	1	7	1	2	2	1	1	2	3	4	1	1
1	4	2	1	4		4		2	1	3	2	2	3	1	1	1	2	4	4	3
2	5	4	5	2		2		2	1	3	1	1	5	1	1	2	8	4	3	7
2	3	2	2	2		2		2	1	3	4	2	3	1	1	2	15	4	4	3
2	3	3	5	5	Another	5	Another	3	2	6	2	1	4	1	1	2	10	4	4	5
2	2	4	2	4		4		5	1	9	4	1	2	1	1	2	11	4	1	5
2	-98	2	6	-96		-96		1	2	2	2	2	2	3	2	2	6	4	10	7
2	3	4	2	2		2		1	2	2	3	1	2	1	1	2	6	4	2	5
2	2	2	3	97		1		2	2	4	1	2	3	1	1	2	4	4	4	1
4	2	2	3	1		1		2	1	3	3	1	4	1	1	2	1	4	5	3
4	5	3	3	1		1		5	2	10	5	1	3	1	1	2	1	4	4	6
1	3	2	2	-96		-96		2	1	3	3	1	3	3	2	2	6	4	9	4
2	3	2	2	1		1		2	1	3	3	2	3	2	1	1	3	4	4	3
1	4	2	6	-96		-96		5	1	9	5	2	3	2	2	1	6	4	4	3
1	4	2	1	2		2		1	1	1	5	2	1	1	1	2	11	4	3	6
1	5	2	1	4		4		8	1	15	4	1	1	1	1	2	14	4	6	6
2	5	4	5	1		1		1	1	1	3	2	2	2	2	1	1	4	4	3
2	2	2	5	2		2		1	2	2	1	2	3	1	1	2	7	4	7	4
1	3	2	2	2		2		1	2	2	2	2	2	1	1	2	9	4	4	6
2	4	1	1	24		24		4	1	7	4	1	2	1	1	2	3	4	9	3
1	4	2	1	4		2		2	1	3	5	2	2	1	1	1	6	4	9	3
2	3	1	2	3		4		1	2	2	2	2	3	1	1	2	6	4	4	2
[truncated: 34 more rows]
